# Supplementary material for: Central role of Th2/Tc2 lymphocytes in pattern II multiple sclerosis lesions
Source: PubMed Central journal article supplement — Ann Clin Transl Neurol. 2015 Jun 8;2(9):875–93. doi: 10.1002/acn3.218 (PMC4574806; doi:10.1002/acn3.218), 2015-06-08
Supplement: acn30002-0875-sd1.pdf [file acn30002-0875-sd1.pdf]

**a**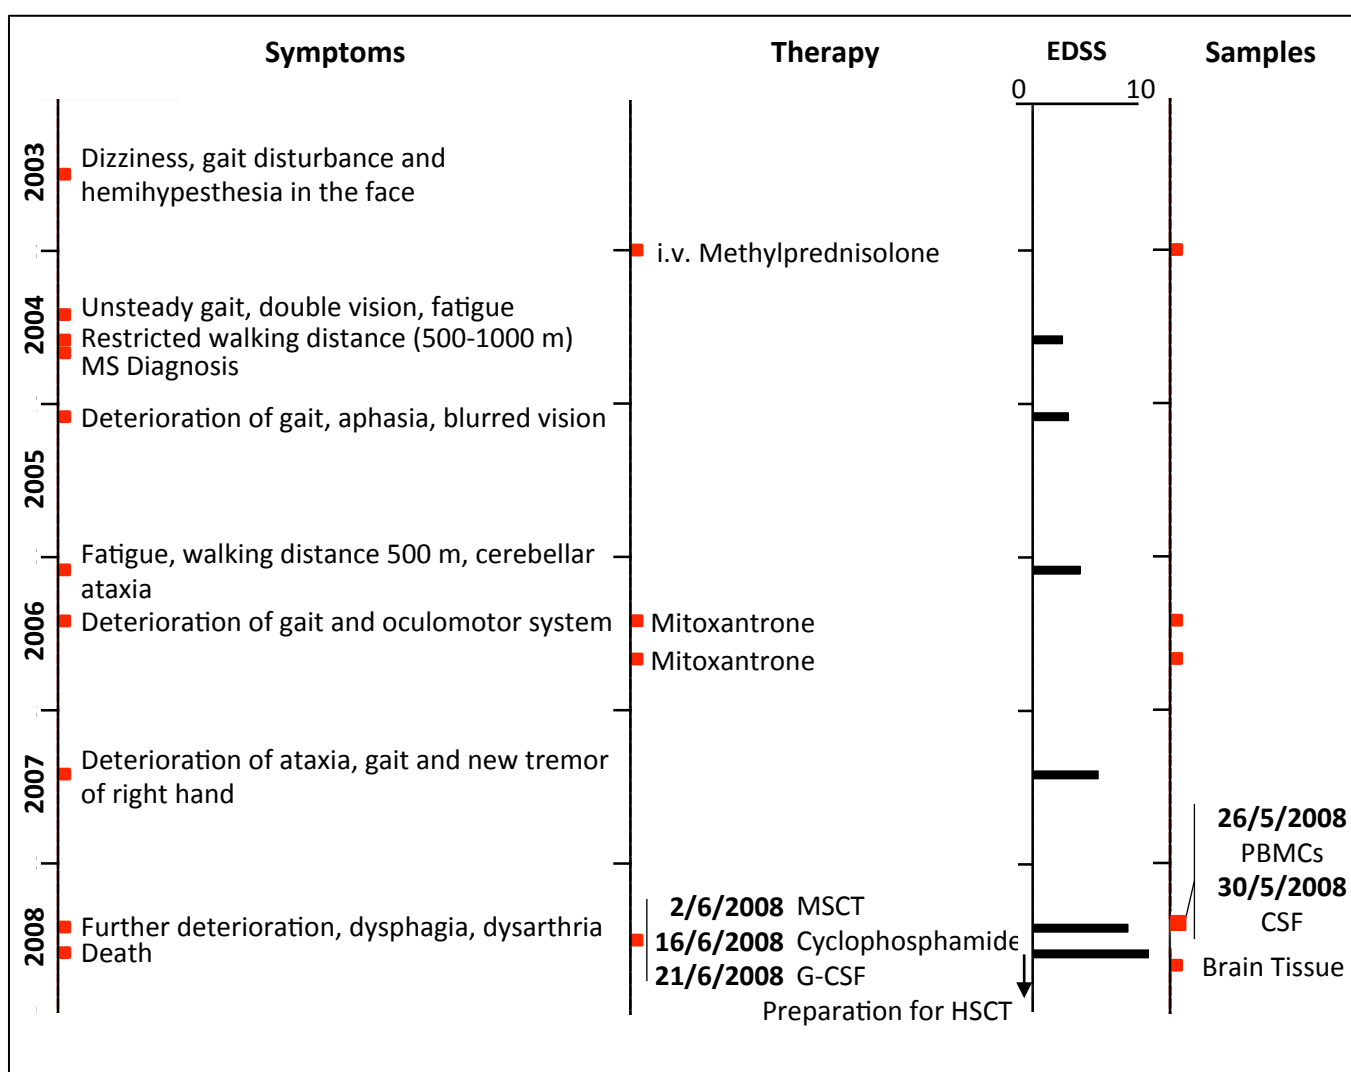**b**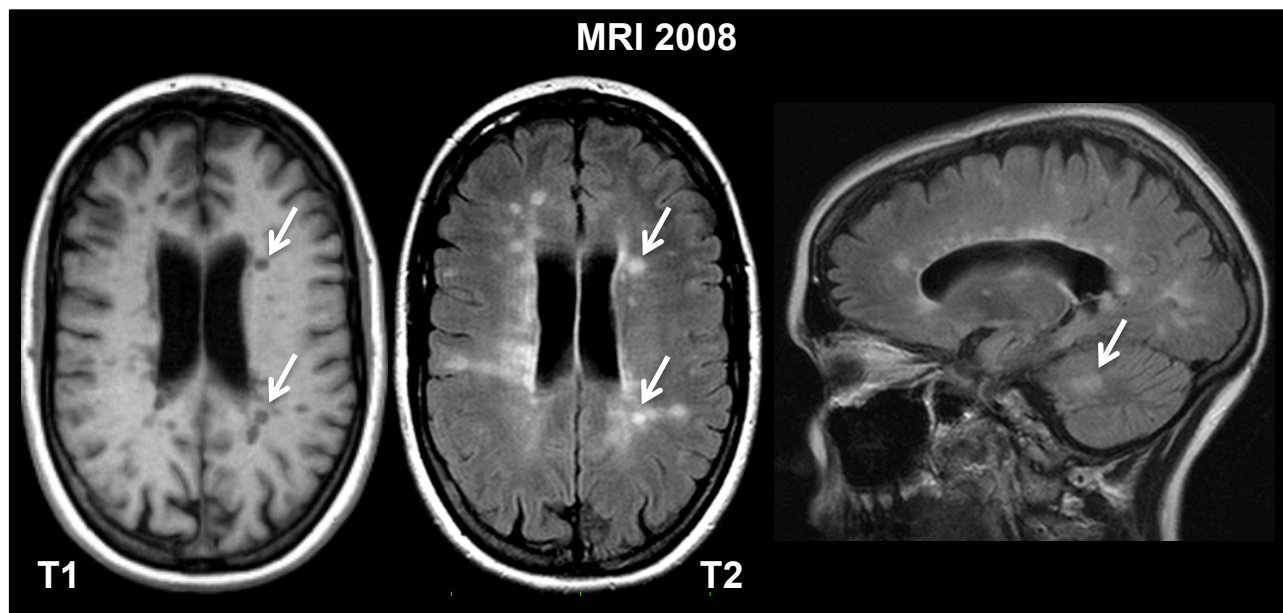

**New Supplementary Figure 1. Clinical and neuroimaging (MRI) information.** **a)** Clinical course of clinical case I. MSCT, allogenic mesenchymal stem cell transplantation and HSCT, autologous hematopoietic stem cell transplantation. **b)** MRI imaging of clinical case I. Axial MRI from 2008 showing massive confluent supra- and infratentorial T1 hypointense and T2 hiperintense lesions and global atrophy. Sagittal MRI shows hyperintense T2 lesions in the cerebellum.

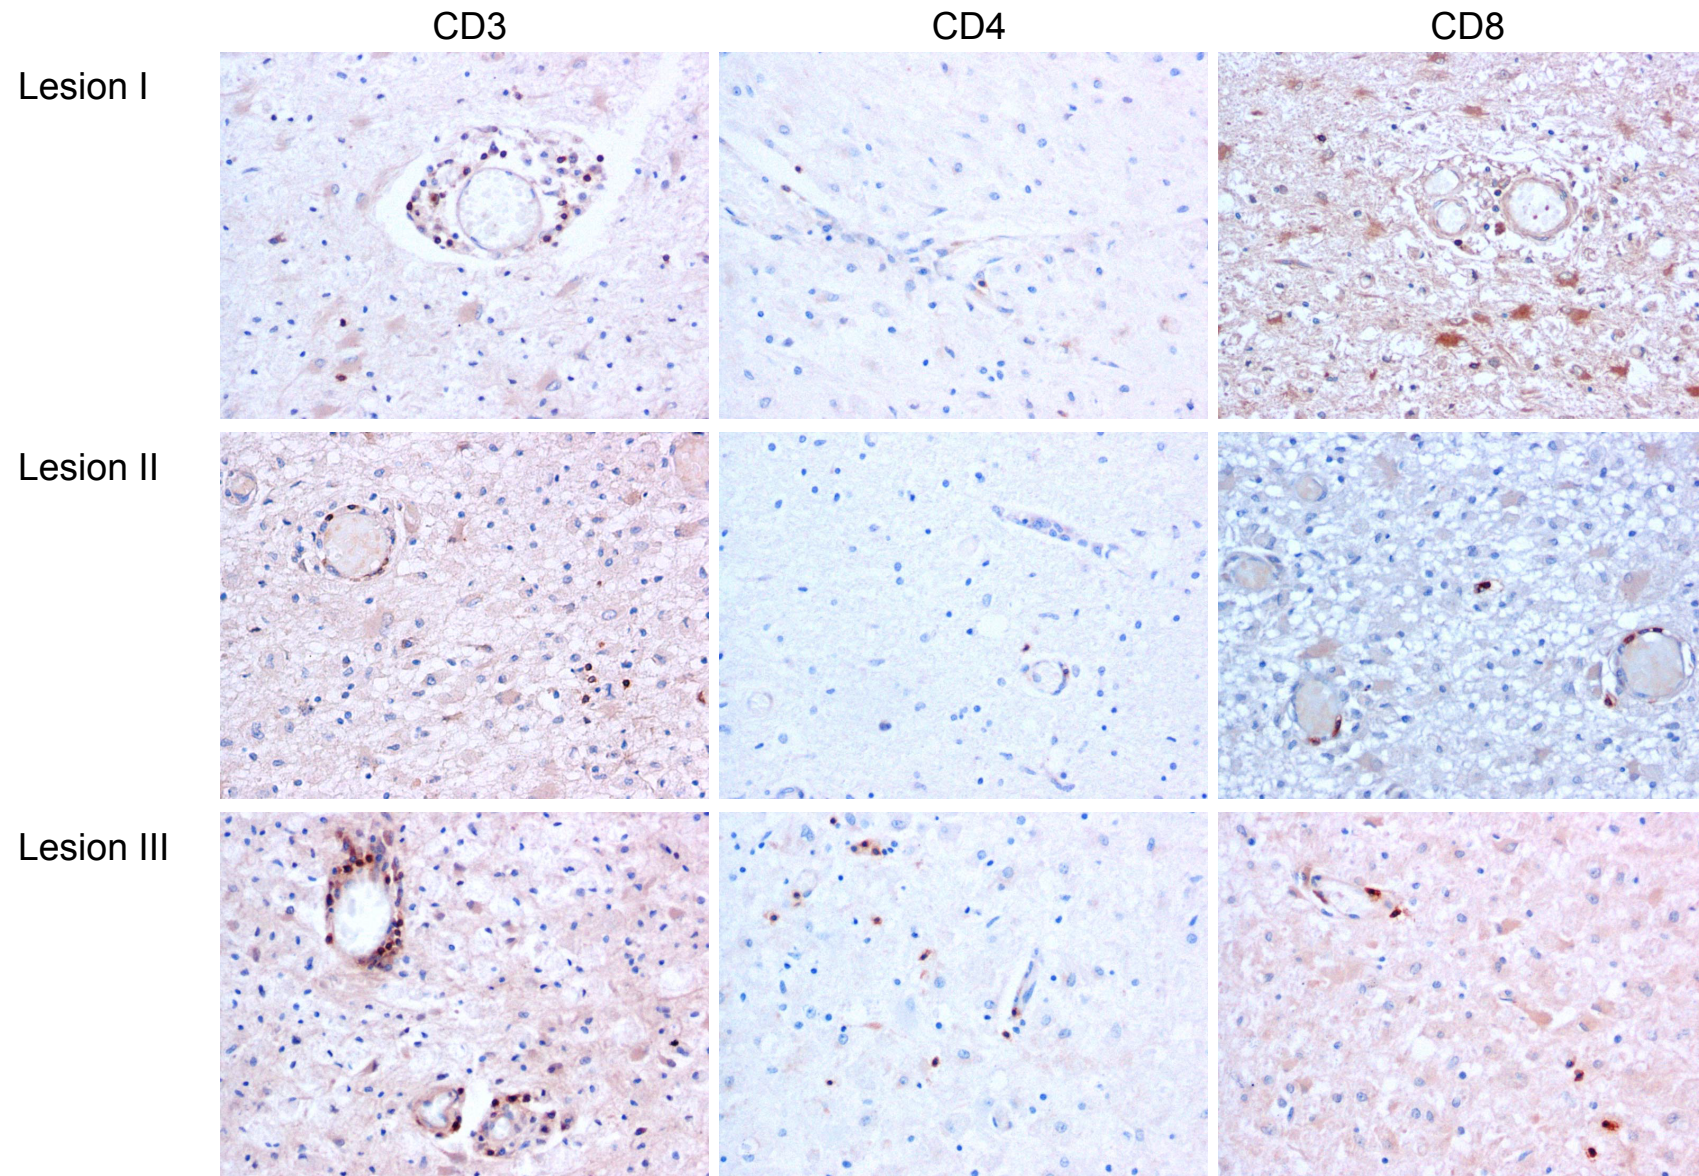

**Supplementary Figure 2. T cell inflammation in pattern II patient.** CD3<sup>+</sup> T cells (left), CD4<sup>+</sup> T cells (middle) and CD8<sup>+</sup> T cells (right) in lesion I (center inactive demyelinated and edge late active demyelinating), lesion II (inactive demyelinated) and lesion III (center late active demyelinating and edges early active demyelinating). Original magnifications x200.

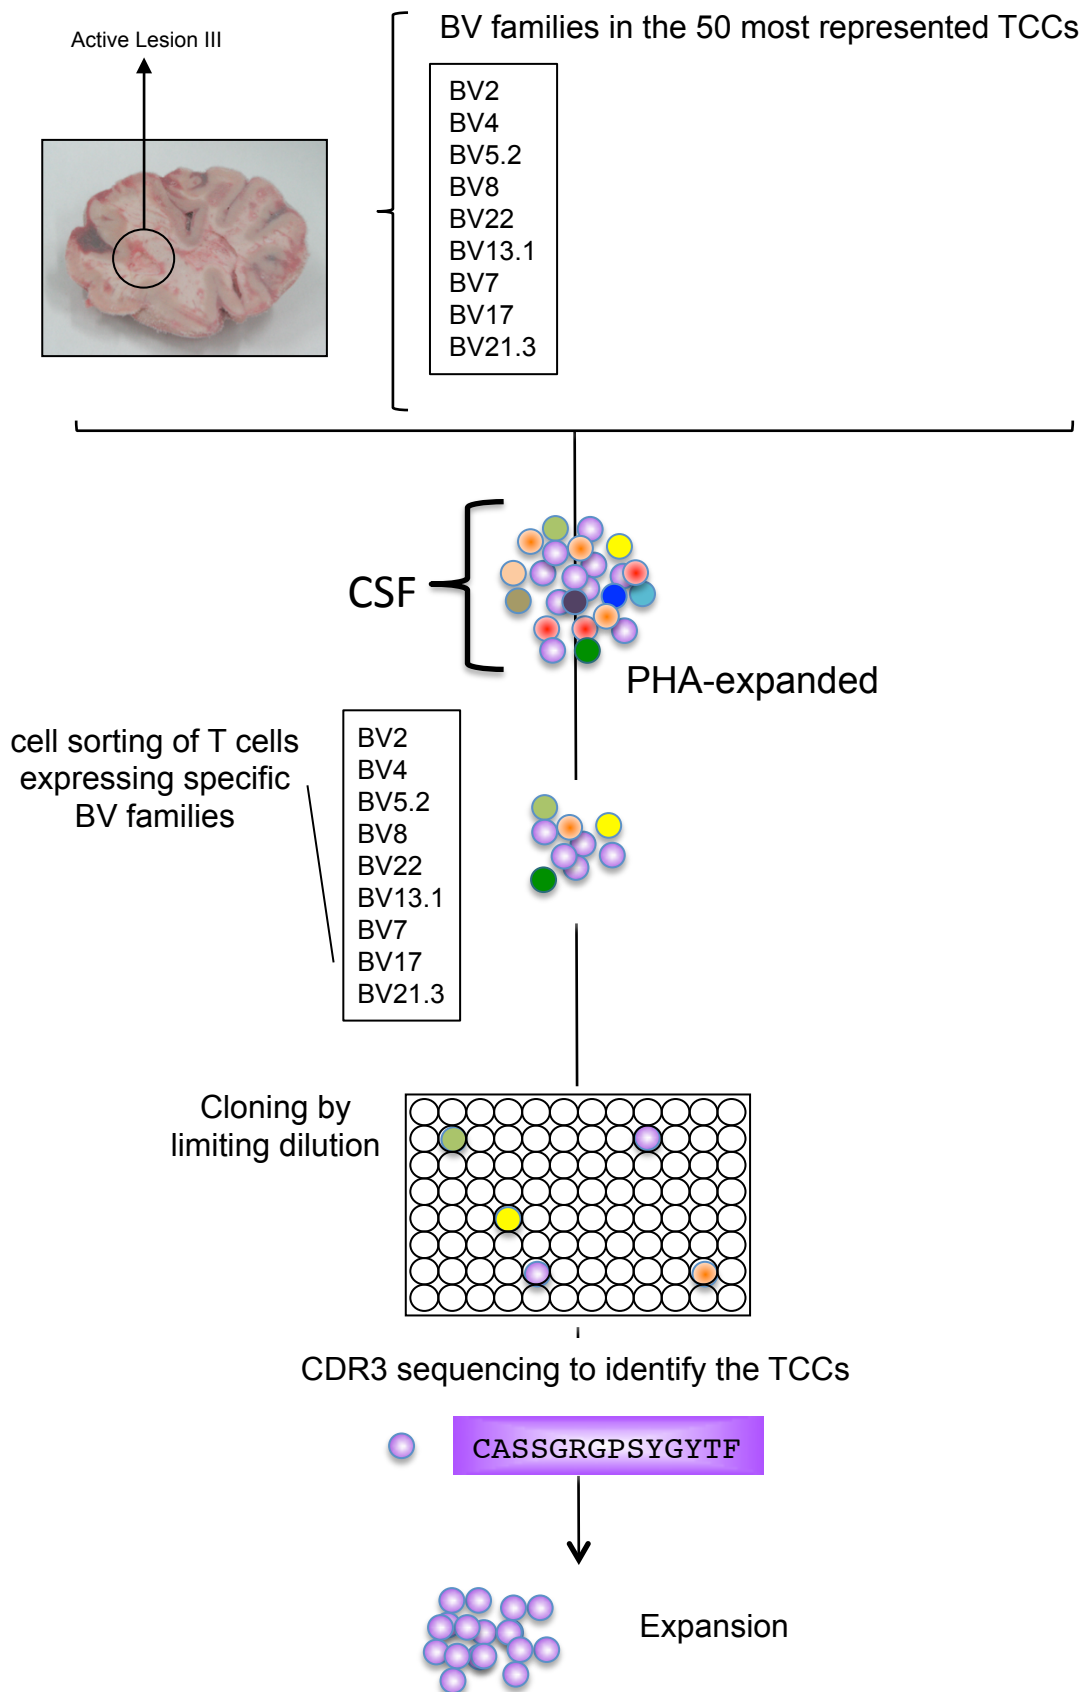

**Supplementary Figure 3.** Schematic representation of the methodological approach used to fish relevant in vivo brain expanded TCCs from CSF infiltrating PHA expanded T cells.

**Supplementary Figure 4. CD40L expression on Tc2 and Th2 T Cell Clones.**

Histograms represent the Fluorescence Intensity (FI) of CD40L surface expression on TCC4-1 (CD8+ Tc2, blue) and TCC21-1 (CD4+ Th2, red) unstimulated or stimulated 6h with 1  $\mu\text{g/ml}$  anti-CD3 antibody (OKT3) and  $10^{-7}$  M PMA.

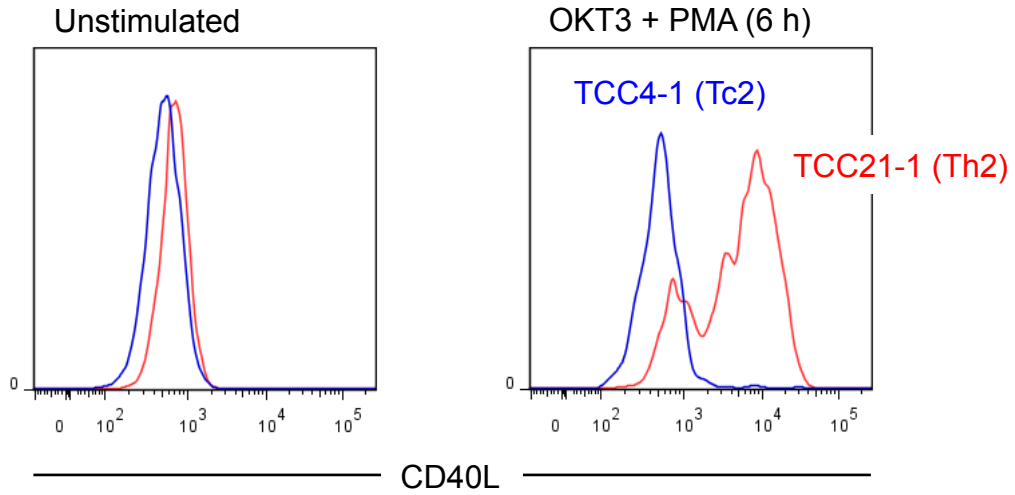

**Supplementary Table 1. Correspondence between the different gene nomenclatures**

| <b>Antibody</b> | <b>Arden et al.<sup>1</sup></b> | <b>IMGT gene name<sup>2</sup></b> |
|-----------------|---------------------------------|-----------------------------------|
| Vβ12            | TCRBV12S1                       | TRBV10-3                          |
| Vβ13.1          | TCRBV13S1                       | TRBV6-5 TRBV6-6 TRBV6-9           |
| Vβ17            | TCRBV17S1                       | TRBV19                            |
| Vβ2             | TCRBV2S1                        | TRBV20-1                          |
| Vβ21.3          | TCRBV21S3                       | TRBV11-2                          |
| Vβ22            | TCRBV22S1                       | TRBV2                             |
| Vβ3             | TCRBV3S1                        | TRBV28                            |
| Vβ4             | TCRBV4S1                        | TRBV29-1                          |
| Vβ5.2           | TCRBV5S2                        | TRBV5-6                           |
| Vβ7             | TCRBV7S1                        | TRBV4-1                           |
| Vβ8.1 and Vb8.2 | TCRBV8S1 and TCRBV8S2           | TRBV12-3 and TRBV12-4             |

<sup>1</sup>Arden, B. et al., Immunogenetics, 42, 455-500 (1995)

<sup>2</sup>Folch, G. and Lefranc, M.-P., Exp. Clin. Immunogenet, 17, 42-54 (2000)

Supplementary Table 2. Complete TCR sequencing in Lesion III

| RANK | CDR3                    | COUNTS        | FREQUENCY       |     | V                    | D                    | J                    | Also present in: |      |
|------|-------------------------|---------------|-----------------|-----|----------------------|----------------------|----------------------|------------------|------|
|      |                         |               |                 | (%) |                      |                      |                      | L-I              | L-II |
| 1    | CSASEGVYEQYF            | 493497        | 30.67779        |     | TCRBV20              | TCRBD01-01*01        | TCRBJ02-07*01        |                  |      |
| 2    | CASSSGPGEAF             | 356183        | 22.14179        |     | TCRBV05-06*01        | TCRBD02-01*02        | TCRBJ02-03*01        |                  |      |
| 3    | <b>CSVEISKGTGNYGYTF</b> | <b>252110</b> | <b>15.67219</b> |     | <b>TCRBV29-01*01</b> | <b>TCRBD01-01*01</b> | <b>TCRBJ01-02*01</b> | X                |      |
| 4    | <b>CSVFQDRGSSGELFF</b>  | <b>169488</b> | <b>10.53607</b> |     | <b>TCRBV29-01*01</b> | <b>TCRBD01-01*01</b> | <b>TCRBJ02-02*01</b> | X                | X    |
| 5    | <b>CSAQLAGGHVDEQFF</b>  | <b>111505</b> | <b>6.93161</b>  |     | <b>TCRBV20</b>       | <b>TCRBD02-01*01</b> | <b>TCRBJ02-01*01</b> | X                |      |
| 6    | <b>CASSLSGTGVYEQYF</b>  | <b>81616</b>  | <b>5.07358</b>  |     | <b>TCRBV12</b>       | <b>TCRBD01-01*01</b> | <b>TCRBJ02-07*01</b> | X                |      |
| 7    | CASSEGGYNSPLHF          | 25295         | 1.57244         |     | TCRBV02-01*01        | TCRBD02-01*01        | TCRBJ01-06*01        |                  |      |
| 8    | CASSLGQGEQYF            | 25076         | 1.55883         |     | TCRBV05-04*01        | TCRBD01-01*01        | TCRBJ02-07*01        |                  |      |
| 9    | CASSLQGWATEAFF          | 24987         | 1.55329         |     | TCRBV05-06*01        | TCRBD01-01*01        | TCRBJ01-01*01        |                  |      |
| 10   | <b>CASSLYRGGTQYF</b>    | <b>13291</b>  | <b>0.82622</b>  |     | <b>TCRBV05-06*01</b> | <b>TCRBD01-01*01</b> | <b>TCRBJ02-03*01</b> | X                |      |
| 11   | CASSLGRVSWGYTF          | 8219          | 0.51093         |     | TCRBV05-06*01        | TCRBD01-01*01        | TCRBJ01-02*01        |                  |      |
| 12   | <b>CASSELAGFYEQYF</b>   | <b>6936</b>   | <b>0.43117</b>  |     | <b>TCRBV06-01*01</b> | <b>TCRBD02-01*01</b> | <b>TCRBJ02-07*01</b> | X                |      |
| 13   | CASSLVLPSTSDTQYF        | 6748          | 0.41948         |     | TCRBV12              | TCRBD02-01           | TCRBJ02-03*01        |                  |      |
| 14   | CASTPSGVGTDTOYF         | 5836          | 0.36279         |     | TCRBV12              | TCRBD02-01*02        | TCRBJ02-03*01        |                  |      |
| 15   | CASSYSFEPAQETOYF        | 5200          | 0.32325         |     | TCRBV06-05*01        | unresolved           | TCRBJ02-05*01        |                  |      |
| 16   | CASSPSMGDGYTF           | 4790          | 0.29777         |     | TCRBV12              | unresolved           | TCRBJ01-02*01        |                  |      |
| 17   | CASSLVLPSTSDRQYF        | 2394          | 0.14882         |     | TCRBV12              | TCRBD02-01           | TCRBJ02-03*01        |                  |      |
| 18   | CASSSGPGEAF             | 2070          | 0.12868         |     | TCRBV05-04*01        | TCRBD02-01*02        | TCRBJ02-03*01        |                  |      |
| 19   | CASSSKQVSNEQFF          | 1847          | 0.11482         |     | TCRBV12              | TCRBD02-01           | TCRBJ02-01*01        |                  |      |
| 20   | CASASGTRDVGEOFF         | 1429          | 0.08883         |     | TCRBV12              | TCRBD02-01*02        | TCRBJ02-01*01        |                  |      |
| 21   | CASSQGQGNQPQHF          | 1259          | 0.07826         |     | TCRBV06-06           | TCRBD01-01*01        | TCRBJ01-05*01        |                  |      |
| 22   | CASSQDGEAIGGKNIQYF      | 1202          | 0.07472         |     | TCRBV04-01*01        | TCRBD02-01*02        | TCRBJ02-04*01        |                  |      |
| 23   | CASSEAGWPQHF            | 997           | 0.06198         |     | TCRBV19-01           | TCRBD02-01*02        | TCRBJ01-05*01        |                  |      |
| 24   | CSVIAFGSPYGYTF          | 984           | 0.06117         |     | TCRBV29-01*01        | unresolved           | TCRBJ01-02*01        |                  |      |
| 25   | <b>CSAGTIDLNTEAFF</b>   | <b>639</b>    | <b>0.03972</b>  |     | <b>TCRBV29-01*01</b> | <b>unresolved</b>    | <b>TCRBJ01-01*01</b> | X                |      |
| 26   | CASSQDGEAIGGKNIQYL      | 621           | 0.03860         |     | TCRBV04-01*01        | unresolved           | TCRBJ02-04*01        |                  |      |
| 27   | <b>CASRAGNTEAFF</b>     | <b>583</b>    | <b>0.03624</b>  |     | <b>TCRBV19-01</b>    | <b>TCRBD01-01*01</b> | <b>TCRBJ01-01*01</b> |                  | X    |
| 28   | CSASEGVYEQYF            | 395           | 0.02455         |     | TCRBV29-01*01        | TCRBD01-01*01        | TCRBJ02-07*01        |                  |      |
| 29   | CASSLVLLTDTQYF          | 303           | 0.01884         |     | TCRBV12              | unresolved           | TCRBJ02-03*01        |                  |      |
| 30   | CASSLVLLTGTQYF          | 301           | 0.01871         |     | TCRBV12              | TCRBD01-01*01        | TCRBJ02-03*01        |                  |      |

|    |                        |            |                |                      |                      |                      |  |          |          |
|----|------------------------|------------|----------------|----------------------|----------------------|----------------------|--|----------|----------|
| 31 | <b>CASSTLGGKYQPQHF</b> | <b>190</b> | <b>0.01181</b> | <b>TCRBV19-01</b>    | <b>unresolved</b>    | <b>TCRBJ01-05*01</b> |  |          | <b>X</b> |
| 32 | CSAQGLAGGHVDEQYF       | 159        | 0.00988        | TCRBV20              | TCRBD02-01*01        | TCRBJ02-07*01        |  |          |          |
| 33 | CASSLQGWATEAFF         | 143        | 0.00889        | TCRBV05-04*01        | TCRBD01-01*01        | TCRBJ01-01*01        |  |          |          |
| 34 | CASSQALWGYEQYF         | 140        | 0.00870        | TCRBV04-01*01        | unresolved           | TCRBJ02-07*01        |  |          |          |
| 35 | CASSNSGSYEQYF          | 116        | 0.00721        | TCRBV06-05*01        | TCRBD02-01           | TCRBJ02-07*01        |  |          |          |
| 36 | CASSRRQGHTEAFF         | 114        | 0.00709        | TCRBV04-01*01        | TCRBD01-01*01        | TCRBJ01-01*01        |  |          |          |
| 37 | CASSNSGPYEQYF          | 101        | 0.00628        | TCRBV06-05*01        | TCRBD02-01           | TCRBJ02-07*01        |  |          |          |
| 38 | CASSSGPGQAF            | 98         | 0.00609        | TCRBV05-06*01        | TCRBD01-01*01        | TCRBJ02-03*01        |  |          |          |
| 39 | CASSLYRGGTQYF          | 94         | 0.00584        | TCRBV05-04*01        | TCRBD01-01*01        | TCRBJ02-03*01        |  |          |          |
| 40 | CASSQEGPRETOYF         | 94         | 0.00584        | TCRBV04-01*01        | TCRBD02-01           | TCRBJ02-05*01        |  |          |          |
| 41 | CSASEGGHVDEQFF         | 70         | 0.00435        | TCRBV20              | TCRBD02-01*01        | TCRBJ02-01*01        |  |          |          |
| 42 | <b>CASSGRGPSYGYTF</b>  | <b>64</b>  | <b>0.00398</b> | <b>TCRBV11-02*02</b> | <b>TCRBD01-01*01</b> | <b>TCRBJ01-02*01</b> |  |          | <b>X</b> |
| 43 | CASSLRQGGGEQYF         | 62         | 0.00385        | TCRBV05-05*01        | unresolved           | TCRBJ02-07*01        |  |          |          |
| 44 | CASSFQLAGDVYNEQFF      | 59         | 0.00367        | TCRBV11-02*02        | TCRBD02-01*02        | TCRBJ02-01*01        |  |          |          |
| 45 | CASSQERGSGANVLTF       | 45         | 0.00280        | TCRBV04-02*01        | TCRBD02-01*02        | TCRBJ02-06*01        |  |          |          |
| 46 | <b>CASSQVQAITQYF</b>   | <b>45</b>  | <b>0.00280</b> | <b>TCRBV04-01*01</b> | <b>TCRBD02-01</b>    | <b>TCRBJ02-03*01</b> |  | <b>X</b> | <b>X</b> |
| 47 | CASSLGRVSWGYTF         | 45         | 0.00280        | TCRBV05-04*01        | TCRBD01-01*01        | TCRBJ01-02*01        |  |          |          |
| 48 | CASSRRQGHTEAFS         | 37         | 0.00230        | TCRBV04-01*01        | TCRBD01-01*01        | TCRBJ01-01*01        |  |          |          |
| 49 | CSAQGLAGGHVDEQFF       | 31         | 0.00193        | TCRBV29-01*01        | TCRBD02-01*01        | TCRBJ02-01*01        |  |          |          |
| 50 | CSVEISKGTGNYGTYF       | 29         | 0.00180        | TCRBV20              | TCRBD01-01*01        | TCRBJ01-02*01        |  |          |          |
| 51 | CASRSGGAREQYF          | 28         | 0.00174        | TCRBV06-01*01        | TCRBD01-01*01        | TCRBJ02-07*01        |  |          |          |
| 52 | CASSSGPG*AF            | 28         | 0.00174        | TCRBV05-06*01        | TCRBD01-01*01        | TCRBJ02-03*01        |  |          |          |
| 53 | CSVEISKGTGNYGTYL       | 26         | 0.00162        | TCRBV29-01*01        | TCRBD01-01*01        | TCRBJ01-02*01        |  |          |          |
| 54 | CASSEGGYN SPLHF        | 25         | 0.00155        | TCRBV12              | TCRBD02-01*01        | TCRBJ01-06*01        |  |          |          |
| 55 | <b>CASNPGTAYSIEQYF</b> | <b>24</b>  | <b>0.00149</b> | <b>TCRBV06-01*01</b> | <b>TCRBD01-01*01</b> | <b>TCRBJ02-07*01</b> |  | <b>X</b> | <b>X</b> |
| 56 | CASEQGYILAHEQYF        | 24         | 0.00149        | TCRBV02-01*01        | TCRBD01-01*01        | TCRBJ02-07*01        |  |          |          |
| 57 | CSVEISKGTGNYGTYF       | 20         | 0.00124        | TCRBV05-06*01        | TCRBD01-01*01        | TCRBJ01-02*01        |  |          |          |
| 58 | CASSFLRGPKRYNEQFF      | 19         | 0.00118        | TCRBV12              | unresolved           | TCRBJ02-01*01        |  |          |          |
| 59 | CASSELAGFYEQYF         | 18         | 0.00112        | TCRBV12              | TCRBD02-01*01        | TCRBJ02-07*01        |  |          |          |
| 60 | CASSLSGTGVYEQYF        | 17         | 0.00106        | TCRBV06-01*01        | TCRBD01-01*01        | TCRBJ02-07*01        |  |          |          |
| 61 | CASKDGTGRLYEQYF        | 16         | 0.00099        | TCRBV02-01*01        | TCRBD01-01*01        | TCRBJ02-07*01        |  |          |          |
| 62 | CASSSQGLTDTQYF         | 15         | 0.00093        | TCRBV05-04*01        | TCRBD01-01*01        | TCRBJ02-03*01        |  |          |          |
| 63 | CSAFQDRGSSGELFF        | 14         | 0.00087        | TCRBV29-01*01        | TCRBD01-01*01        | TCRBJ02-02*01        |  |          |          |

|           |                       |          |                |                      |                      |                      |
|-----------|-----------------------|----------|----------------|----------------------|----------------------|----------------------|
| 64        | GSVFQDRGSSGELFF       | 14       | 0.00087        | TCRBV29-01*01        | TCRBD01-01*01        | TCRBJ02-02*01        |
| 65        | CSPQGLAGGHVDEQYF      | 13       | 0.00081        | TCRBV20              | TCRBD02-01*01        | TCRBJ02-07*01        |
| 66        | CASSLVHGPYTF          | 12       | 0.00075        | TCRBV28-01*01        | unresolved           | TCRBJ01-02*01        |
| 67        | CSVGISKGTGNYGYTF      | 12       | 0.00075        | TCRBV29-01*01        | TCRBD01-01*01        | TCRBJ01-02*01        |
| 68        | SVFQDRGSSGELFF        | 11       | 0.00068        | TCRBV29-01*01        | TCRBD01-01*01        | TCRBJ02-02*01        |
| 69        | CSVEISKGAGNYGYTF      | 11       | 0.00068        | TCRBV29-01*01        | TCRBD01-01*01        | TCRBJ01-02*01        |
| 70        | CSASEGVYEQYS          | 10       | 0.00062        | TCRBV20              | TCRBD01-01*01        | TCRBJ02-07*01        |
| 71        | CSVGDYGYTF            | 10       | 0.00062        | TCRBV29-01*01        | TCRBD02-01*02        | TCRBJ01-02*01        |
| 72        | CASSSGPGEAF           | 9        | 0.00056        | TCRBV12              | TCRBD02-01*02        | TCRBJ02-03*01        |
| 73        | CASSLSGTGVYEQYF       | 9        | 0.00056        | TCRBV05-04*01        | TCRBD01-01*01        | TCRBJ02-07*01        |
| 74        | CASSLGQGEQYF          | 9        | 0.00056        | TCRBV12              | TCRBD01-01*01        | TCRBJ02-07*01        |
| 75        | GSVFQDRGSSGELFF       | 8        | 0.00050        | TCRBV20              | TCRBD01-01*01        | TCRBJ02-02*01        |
| 76        | CASSIAGYGEQYF         | 8        | 0.00050        | TCRBV19-01           | TCRBD02-01*01        | TCRBJ02-07*01        |
| 77        | GSVFQDRGSSGELLF       | 8        | 0.00050        | TCRBV29-01*01        | TCRBD01-01*01        | TCRBJ01-03*01        |
| 78        | CSAQGLTGGHVDEQYF      | 8        | 0.00050        | TCRBV20              | TCRBD02-01*01        | TCRBJ02-01*01        |
| 79        | GSVFQDRGSSGELFF       | 8        | 0.00050        | TCRBV29-01*01        | TCRBD01-01*01        | TCRBJ02-02*01        |
| 80        | CNVGISKGTGNYGYTF      | 8        | 0.00050        | TCRBV29-01*01        | TCRBD01-01*01        | TCRBJ01-02*01        |
| 81        | CASSLSGTGVYEQYF       | 7        | 0.00044        | TCRBV02-01*01        | TCRBD01-01*01        | TCRBJ02-07*01        |
| 82        | CSVKISKGTGNYGYTF      | 7        | 0.00044        | TCRBV29-01*01        | TCRBD01-01*01        | TCRBJ01-02*01        |
| 83        | CSASEGVYEQYL          | 7        | 0.00044        | TCRBV20              | TCRBD01-01*01        | TCRBJ02-07*01        |
| 84        | CASSLSGTGVYEQYF       | 6        | 0.00037        | TCRBV06-05*01        | TCRBD01-01*01        | TCRBJ02-07*01        |
| 85        | CSVGISKVTGNYGYTF      | 6        | 0.00037        | TCRBV29-01*01        | TCRBD01-01*01        | TCRBJ01-02*01        |
| 86        | CSVFRDRGSSGELFF       | 6        | 0.00037        | TCRBV29-01*01        | TCRBD01-01*01        | TCRBJ02-02*01        |
| 87        | CCVFQDRGSSGELFF       | 6        | 0.00037        | TCRBV29-01*01        | TCRBD01-01*01        | TCRBJ02-02*01        |
| 88        | CGAQGLAGGHVVDKQYF     | 6        | 0.00037        | TCRBV20              | TCRBD02-01*01        | TCRBJ02-01*01        |
| 89        | CASSEGG*NSPLRF        | 6        | 0.00037        | TCRBV02-01*01        | TCRBD02-01*01        | TCRBJ01-06*01        |
| 90        | CSASEGVFDQYF          | 6        | 0.00037        | TCRBV20              | TCRBD01-01*01        | TCRBJ02-07*01        |
| <b>91</b> | <b>CSVEGQGASETQYF</b> | <b>6</b> | <b>0.00037</b> | <b>TCRBV29-01*01</b> | <b>TCRBD01-01*01</b> | <b>TCRBJ02-05*01</b> |
| 92        | RSVEISKGTGNYGCTF      | 6        | 0.00037        | TCRBV29-01*01        | TCRBD01-01*01        | TCRBJ01-02*01        |
| 93        | CSAGEGVYEQYF          | 6        | 0.00037        | TCRBV20              | TCRBD01-01*01        | TCRBJ02-07*01        |
| 94        | CASSYSFEPAQETQYF      | 5        | 0.00031        | TCRBV12              | unresolved           | TCRBJ02-05*01        |
| 95        | CSVEVSKGTGNYGYTF      | 5        | 0.00031        | TCRBV29-01*01        | TCRBD01-01*01        | TCRBJ01-02*01        |
| 96        | YSVEISEGTGNYGYTF      | 5        | 0.00031        | TCRBV29-01*01        | TCRBD01-01*01        | TCRBJ01-02*01        |



|     |                   |   |         |               |               |               |
|-----|-------------------|---|---------|---------------|---------------|---------------|
| 97  | CSVEISKGSGNYGYTF  | 5 | 0.00031 | TCRBV29-01*01 | TCRBD01-01*01 | TCRBJ01-02*01 |
| 98  | CSVFQGRGSSGELVF   | 5 | 0.00031 | TCRBV29-01*01 | TCRBD02-01*01 | TCRBJ02-02*01 |
| 99  | CGVFQDRGSSGELFF   | 5 | 0.00031 | TCRBV29-01*01 | TCRBD01-01*01 | TCRBJ02-02*01 |
| 100 | FSVFQDRGSSGELFF   | 5 | 0.00031 | TCRBV29-01*01 | TCRBD01-01*01 | TCRBJ02-02*01 |
| 101 | CSVFQDRGSSGELPF   | 5 | 0.00031 | TCRBV29-01*01 | TCRBD01-01*01 | TCRBJ02-02*01 |
| 102 | CSVFQDRGSSGELFS   | 5 | 0.00031 | TCRBV29-01*01 | TCRBD01-01*01 | TCRBJ02-02*01 |
| 103 | RSVFQDKGSSGELFF   | 5 | 0.00031 | TCRBV29-01*01 | TCRBD01-01*01 | TCRBJ02-02*01 |
| 104 | CSVFQDRGSSGKPF    | 5 | 0.00031 | TCRBV29-01*01 | TCRBD01-01*01 | TCRBJ02-02*01 |
| 105 | CSVFQDRGSSGEPFF   | 5 | 0.00031 | TCRBV29-01*01 | TCRBD01-01*01 | TCRBJ02-02*01 |
| 106 | CSVQGLAGGHVVEEQFF | 5 | 0.00031 | TCRBV20       | TCRBD02-01*01 | TCRBJ02-01*01 |
| 107 | CSASEGVYVDEQFF    | 5 | 0.00031 | TCRBV20       | TCRBD01-01*01 | TCRBJ02-01*01 |
| 108 | CSAEISKGTGNYGYTF  | 5 | 0.00031 | TCRBV29-01*01 | TCRBD01-01*01 | TCRBJ01-02*01 |
| 109 | CSVGISKGTGNYGCTF  | 5 | 0.00031 | TCRBV29-01*01 | TCRBD01-01*01 | TCRBJ01-02*01 |
| 110 | CASSSGPGEAF       | 4 | 0.00025 | TCRBV04-02*01 | TCRBD02-01*02 | TCRBJ02-03*01 |
| 111 | CASSPSMGDGYTF     | 4 | 0.00025 | TCRBV02-01*01 | unresolved    | TCRBJ01-02*01 |
| 112 | CASSLVLPTSTDTQYF  | 4 | 0.00025 | TCRBV05-06*01 | TCRBD02-01    | TCRBJ02-03*01 |
| 113 | CASSLVLPTSTDRQYF  | 4 | 0.00025 | TCRBV05-06*01 | TCRBD02-01    | TCRBJ02-03*01 |
| 114 | CSVEILKETGNYGYTF  | 4 | 0.00025 | TCRBV29-01*01 | TCRBD01-01*01 | TCRBJ01-02*01 |
| 115 | CNVKISKGTGNYSYTF  | 4 | 0.00025 | TCRBV29-01*01 | TCRBD01-01*01 | TCRBJ01-02*01 |
| 116 | CSVEISKGTGNCGF    | 4 | 0.00025 | TCRBV29-01*01 | TCRBD01-01*01 | TCRBJ01-02*01 |
| 117 | CSVEISEGAGN*GYTF  | 4 | 0.00025 | TCRBV29-01*01 | TCRBD01-01*01 | TCRBJ01-02*01 |
| 118 | CSVEI*KGTGNYGYTF  | 4 | 0.00025 | TCRBV29-01*01 | TCRBD01-01*01 | TCRBJ01-02*01 |
| 119 | CSVEISKGTGNYGCIF  | 4 | 0.00025 | TCRBV29-01*01 | TCRBD01-01*01 | TCRBJ01-02*01 |
| 120 | CSVELSKGAGNYGYTF  | 4 | 0.00025 | TCRBV29-01*01 | TCRBD01-01*01 | TCRBJ01-02*01 |
| 121 | CASSLYRGGTQYL     | 4 | 0.00025 | TCRBV05-06*01 | TCRBD01-01*01 | TCRBJ02-03*01 |
| 122 | CASSLGRGGTQYF     | 4 | 0.00025 | TCRBV05-06*01 | unresolved    | TCRBJ02-03*01 |
| 123 | CSVFQDRGSSRELFF   | 4 | 0.00025 | TCRBV29-01*01 | TCRBD01-01*01 | TCRBJ02-02*01 |
| 124 | CSAFQDGGSSGELSF   | 4 | 0.00025 | TCRBV29-01*01 | TCRBD02-01*01 | TCRBJ02-02*01 |
| 125 | CSVFQERGSSGELFF   | 4 | 0.00025 | TCRBV29-01*01 | unresolved    | TCRBJ02-02*01 |
| 126 | CSVFQDGGSSSEELFF  | 4 | 0.00025 | TCRBV29-01*01 | TCRBD02-01*01 | TCRBJ02-02*01 |
| 127 | *SAQGLAGGHVDEQFF  | 4 | 0.00025 | TCRBV20       | TCRBD02-01*01 | TCRBJ02-01*01 |
| 128 | CASSSKQVSNEQYF    | 4 | 0.00025 | TCRBV12       | TCRBD02-01    | TCRBJ02-07*01 |
| 129 | SASSEGG*NSPLLF    | 4 | 0.00025 | TCRBV02-01*01 | TCRBD02-01*01 | TCRBJ01-06*01 |

|     |                   |   |         |               |               |               |
|-----|-------------------|---|---------|---------------|---------------|---------------|
| 130 | CASNGGLGTNEQYF    | 4 | 0.00025 | TCRBV02-01*01 | TCRBD02-01    | TCRBJ02-07*01 |
| 131 | CASSGGGYN SPLHF   | 4 | 0.00025 | TCRBV02-01*01 | TCRBD02-01*01 | TCRBJ01-06*01 |
| 132 | CSAEISKGTGNNGYTFF | 4 | 0.00025 | TCRBV29-01*01 | TCRBD01-01*01 | TCRBJ01-02*01 |
| 133 | CASSLSGTGVSDQYF   | 4 | 0.00025 | TCRBV12       | TCRBD01-01*01 | TCRBJ02-07*01 |
| 134 | CSASEGVYEQCF      | 4 | 0.00025 | TCRBV20       | TCRBD01-01*01 | TCRBJ02-07*01 |
| 135 | FSASEGVYEQYF      | 4 | 0.00025 | TCRBV20       | TCRBD01-01*01 | TCRBJ02-07*01 |
| 136 | SSASEGVYEQYF      | 4 | 0.00025 | TCRBV20       | TCRBD01-01*01 | TCRBJ02-07*01 |
| 137 | CASSELAGFYEQYL    | 4 | 0.00025 | TCRBV06-01*01 | TCRBD02-01*01 | TCRBJ02-07*01 |
| 138 | CAGSSGPGEVF       | 4 | 0.00025 | TCRBV05-06*01 | TCRBD02-01*02 | TCRBJ02       |
| 139 | GASSSGPGEAF       | 4 | 0.00025 | TCRBV05-06*01 | TCRBD02-01*02 | TCRBJ02-03*01 |
| 140 | CSASEGLAGGHVDEQFF | 4 | 0.00025 | TCRBV20       | TCRBD02-01*01 | TCRBJ02-01*01 |
| 141 | CASSLYRVSWGYTF    | 4 | 0.00025 | TCRBV05-06*01 | TCRBD01-01*01 | TCRBJ01-02*01 |
| 142 | CASSYSFEPAQGTQYF  | 4 | 0.00025 | TCRBV06-06    | unresolved    | TCRBJ02-05*01 |
| 143 | CSVEISKGTGNHGYTF  | 4 | 0.00025 | TCRBV29-01*01 | TCRBD01-01*01 | TCRBJ01-02*01 |
| 144 | CSPQGLAGGHVGEQFF  | 4 | 0.00025 | TCRBV20       | TCRBD02-01*01 | TCRBJ02-01*01 |
| 145 | CSAQGLAGGHADQFF   | 4 | 0.00025 | TCRBV20       | TCRBD02-01*01 | TCRBJ02-01*01 |
| 146 | CSASERVYEQYF      | 4 | 0.00025 | TCRBV20       | TCRBD02-01    | TCRBJ02-07*01 |
| 147 | CSASEGAYEQYF      | 4 | 0.00025 | TCRBV20       | TCRBD01-01*01 | TCRBJ02-07*01 |
| 148 | CSASEGVCEQYF      | 4 | 0.00025 | TCRBV20       | TCRBD01-01*01 | TCRBJ02-07*01 |
| 149 | CSVEISKGTGNHGYTS  | 3 | 0.00019 | TCRBV29-01*01 | TCRBD01-01*01 | TCRBJ01-02*01 |
| 150 | CSVEISKGAGNYGCTF  | 3 | 0.00019 | TCRBV29-01*01 | TCRBD01-01*01 | TCRBJ01-02*01 |
| 151 | YSVEISKGTGNYGYAF  | 3 | 0.00019 | TCRBV29-01*01 | TCRBD01-01*01 | TCRBJ01-02*01 |
| 152 | CSVETPKGTGNYGYTS  | 3 | 0.00019 | TCRBV29-01*01 | TCRBD01-01*01 | TCRBJ01-02*01 |
| 153 | CSVGISKGTGSYGYTF  | 3 | 0.00019 | TCRBV29-01*01 | TCRBD01-01*01 | TCRBJ01-02*01 |
| 154 | CSVGASKGSGNYGYTF  | 3 | 0.00019 | TCRBV29-01*01 | TCRBD01-01*01 | TCRBJ01-02*01 |
| 155 | CGVRISKGTGNYGYTF  | 3 | 0.00019 | TCRBV29-01*01 | TCRBD01-01*01 | TCRBJ01-02*01 |
| 156 | CGVEILKGTGNYGNFF  | 3 | 0.00019 | TCRBV29-01*01 | TCRBD01-01*01 | TCRBJ01-02*01 |
| 157 | CGVGISKGTGNYGYTF  | 3 | 0.00019 | TCRBV29-01*01 | TCRBD01-01*01 | TCRBJ01-02*01 |
| 158 | CSVEISKGTGNYGCTF  | 3 | 0.00019 | TCRBV29-01*01 | TCRBD01-01*01 | TCRBJ01-02*01 |
| 159 | SSVEISKGTGNYGYTF  | 3 | 0.00019 | TCRBV29-01*01 | TCRBD01-01*01 | TCRBJ01-02*01 |
| 160 | CGVFQDRGSSGELFF   | 3 | 0.00019 | TCRBV29-01*01 | TCRBD01-01*01 | TCRBJ02-02*01 |
| 161 | CSVFQDGGSSGELFF   | 3 | 0.00019 | TCRBV29-01*01 | TCRBD02-01*01 | TCRBJ02-02*01 |
| 162 | CSVEISRGTGNYGYTF  | 3 | 0.00019 | TCRBV29-01*01 | TCRBD01-01*01 | TCRBJ01-02*01 |

|     |                  |   |         |                |               |               |
|-----|------------------|---|---------|----------------|---------------|---------------|
| 163 | CSVEISKGTGNYGHTF | 3 | 0.00019 | TCRBV29-01*01  | TCRBD01-01*01 | TCRBJ01-02*01 |
| 164 | CSPQGLAGGHVDEQFF | 3 | 0.00019 | TCRBV20        | TCRBD02-01*01 | TCRBJ02-01*01 |
| 165 | CSAQGLAGGRVDEQLF | 3 | 0.00019 | TCRBV20        | TCRBD02-01*01 | TCRBJ02-01*01 |
| 166 | CSAQGLAGGHVNEQFF | 3 | 0.00019 | TCRBV20        | TCRBD02-01*01 | TCRBJ02-01*01 |
| 167 | CSVGEGVYEQYF     | 3 | 0.00019 | TCRBV20        | TCRBD01-01*01 | TCRBJ02-07*01 |
| 168 | RSASEGVYGOYF     | 3 | 0.00019 | TCRBV20        | TCRBD01-01*01 | TCRBJ02-07*01 |
| 169 | RSASEGVYEQYF     | 3 | 0.00019 | TCRBV20-or09_0 | TCRBD01-01*01 | TCRBJ02-07*01 |
| 170 | CSVEIPKGTGNYGYTF | 3 | 0.00019 | TCRBV29-01*01  | TCRBD01-01*01 | TCRBJ01-02*01 |
| 171 | CSVEISKGTRNYGYTF | 2 | 0.00012 | TCRBV29-01*01  | TCRBD01-01*01 | TCRBJ01-02*01 |
| 172 | CSVEISKGTGNYGYTV | 2 | 0.00012 | TCRBV29-01*01  | TCRBD01-01*01 | TCRBJ01-02*01 |
| 173 | CSVENSKGTGNYGYTF | 2 | 0.00012 | TCRBV29-01*01  | TCRBD01-01*01 | TCRBJ01-02*01 |
| 174 | CSVENSKGTGNYGYTF | 2 | 0.00012 | TCRBV29-01*01  | TCRBD01-01*01 | TCRBJ01-02*01 |
| 175 | CSVETSKGTGDYGYTF | 2 | 0.00012 | TCRBV29-01*01  | TCRBD01-01*01 | TCRBJ01-02*01 |
| 176 | CSVEISEGTGNYGYTF | 2 | 0.00012 | TCRBV29-01*01  | TCRBD01-01*01 | TCRBJ01-02*01 |
| 177 | RSVEISKGTGNYGYTF | 2 | 0.00012 | TCRBV29-01*01  | TCRBD01-01*01 | TCRBJ01-02*01 |
| 178 | CSVEISKETGNYGYTF | 2 | 0.00012 | TCRBV29-01*01  | TCRBD01-01*01 | TCRBJ01-02*01 |
| 179 | RSVEISKGTGDYGFTF | 2 | 0.00012 | TCRBV29-01*01  | TCRBD01-01*01 | TCRBJ01-02*01 |
| 180 | CSVEISKGTGDYGFTF | 2 | 0.00012 | TCRBV29-01*01  | TCRBD01-01*01 | TCRBJ01-02*01 |
| 181 | CSVEISEGTGSYGYTF | 2 | 0.00012 | TCRBV29-01*01  | TCRBD01-01*01 | TCRBJ01-02*01 |
| 182 | RSVEI*KETGNYGYTF | 2 | 0.00012 | TCRBV29-01*01  | TCRBD01-01*01 | TCRBJ01-02*01 |
| 183 | RSVETSKGTGNYGYTF | 2 | 0.00012 | TCRBV29-01*01  | TCRBD01-01*01 | TCRBJ01-02*01 |
| 184 | CSAEILKGTGNYGYTF | 2 | 0.00012 | TCRBV29-01*01  | TCRBD01-01*01 | TCRBJ01-02*01 |
| 185 | CSVRIKGTGNYGCTF  | 2 | 0.00012 | TCRBV29-01*01  | TCRBD01-01*01 | TCRBJ01-02*01 |
| 186 | CSVEISKGTGNCGYTL | 2 | 0.00012 | TCRBV29-01*01  | TCRBD01-01*01 | TCRBJ01-02*01 |
| 187 | CSVEISKGTENYGNTF | 2 | 0.00012 | TCRBV29-01*01  | TCRBD01-01*01 | TCRBJ01-02*01 |
| 188 | CSVEISKGTGNYGCTL | 2 | 0.00012 | TCRBV29-01*01  | TCRBD01-01*01 | TCRBJ01-02*01 |
| 189 | CSVEISKGTGNCGYTI | 2 | 0.00012 | TCRBV29-01*01  | TCRBD01-01*01 | TCRBJ01-02*01 |
| 190 | CSVEISKGTGNYGCTL | 2 | 0.00012 | TCRBV29-01*01  | unresolved    | TCRBJ01-02*01 |
| 191 | CSVEISRGTGNYGYSF | 2 | 0.00012 | TCRBV29-01*01  | TCRBD01-01*01 | TCRBJ01-02*01 |
| 192 | CSVEISKGTGNHGYS  | 2 | 0.00012 | TCRBV29-01*01  | TCRBD01-01*01 | TCRBJ01-02*01 |
| 193 | CSSEISKGTGNYGYTF | 2 | 0.00012 | TCRBV29-01*01  | TCRBD01-01*01 | TCRBJ01-02*01 |
| 194 | CSVEISRGTGNYGYTV | 2 | 0.00012 | TCRBV29-01*01  | TCRBD01-01*01 | TCRBJ01-02*01 |
| 195 | CGVEISKGTGNYGYTL | 2 | 0.00012 | TCRBV29-01*01  | TCRBD01-01*01 | TCRBJ01-02*01 |

|     |                  |   |         |               |               |               |
|-----|------------------|---|---------|---------------|---------------|---------------|
| 196 | RSVEISKGTGDYGYTF | 2 | 0.00012 | TCRBV29-01*01 | TCRBD01-01*01 | TCRBJ01-02*01 |
| 197 | CSVEISKGAGNYGHTF | 2 | 0.00012 | TCRBV29-01*01 | TCRBD01-01*01 | TCRBJ01-02*01 |
| 198 | CSVEISEGTGNYGYTF | 2 | 0.00012 | TCRBV29-01*01 | TCRBD01-01*01 | TCRBJ01-02*01 |
| 199 | CSVEISKGTGSYGYTF | 2 | 0.00012 | TCRBV29-01*01 | TCRBD01-01*01 | TCRBJ01-02*01 |
| 200 | CSAEISKGTGNYGYTF | 2 | 0.00012 | TCRBV29-01*01 | TCRBD01-01*01 | TCRBJ01-02*01 |
| 201 | CSVEISKGTGSYGYTF | 2 | 0.00012 | TCRBV29-01*01 | TCRBD01-01*01 | TCRBJ01-02*01 |
| 202 | CSVEISKGTGNYGHTF | 2 | 0.00012 | TCRBV29-01*01 | TCRBD01-01*01 | TCRBJ01-02*01 |
| 203 | CSVEISKGTGNYGCTF | 2 | 0.00012 | TCRBV29-01*01 | TCRBD01-01*01 | TCRBJ01-02*01 |
| 204 | CSVEISEGTGIYGYTF | 2 | 0.00012 | TCRBV29-01*01 | TCRBD01-01*01 | TCRBJ01-02*01 |
| 205 | CSVEILRGTGNYGYTF | 2 | 0.00012 | TCRBV29-01*01 | TCRBD01-01*01 | TCRBJ01-02*01 |
| 206 | CSVEIS*GTGNYGYTF | 2 | 0.00012 | TCRBV29-01*01 | TCRBD01-01*01 | TCRBJ01-02*01 |
| 207 | CSVEISKGTGDYGFTF | 2 | 0.00012 | TCRBV29-01*01 | TCRBD01-01*01 | TCRBJ01-02*01 |
| 208 | CSVGISKVAGNYGYTF | 2 | 0.00012 | TCRBV29-01*01 | TCRBD01-01*01 | TCRBJ01-02*01 |
| 209 | CSVEFSKGTGNYGYTF | 2 | 0.00012 | TCRBV29-01*01 | TCRBD01-01*01 | TCRBJ01-02*01 |
| 210 | CSVEILKGTGNYGYTF | 2 | 0.00012 | TCRBV29-01*01 | TCRBD01-01*01 | TCRBJ01-02*01 |
| 211 | CSIEIPKGTGNYGYTF | 2 | 0.00012 | TCRBV29-01*01 | TCRBD01-01*01 | TCRBJ01-02*01 |
| 212 | CSVGVSKGTGNYGYTF | 2 | 0.00012 | TCRBV29-01*01 | TCRBD01-01*01 | TCRBJ01-02*01 |
| 213 | CSVEISKGTGNYGYSF | 2 | 0.00012 | TCRBV29-01*01 | TCRBD01-01*01 | TCRBJ01-02*01 |
| 214 | CGVEISKGTGNYGYTF | 2 | 0.00012 | TCRBV29-01*01 | TCRBD01-01*01 | TCRBJ01-02*01 |
| 215 | CSVEISRGAGNYGYTF | 2 | 0.00012 | TCRBV29-01*01 | unresolved    | TCRBJ01-02*01 |
| 216 | CSVGIPKGTGNYGYTF | 2 | 0.00012 | TCRBV29-01*01 | TCRBD01-01*01 | TCRBJ01-02*01 |
| 217 | CSVEISKGTGNCGYTF | 2 | 0.00012 | TCRBV29-01*01 | TCRBD01-01*01 | TCRBJ01-02*01 |
| 218 | YSVFQDRGSSGELFF  | 2 | 0.00012 | TCRBV29-01*01 | TCRBD01-01*01 | TCRBJ02-02*01 |
| 219 | RSVFQDRGSSGGLFF  | 2 | 0.00012 | TCRBV29-01*01 | TCRBD01-01*01 | TCRBJ02-02*01 |
| 220 | CSVFQDRGSSGEVFF  | 2 | 0.00012 | TCRBV29-01*01 | TCRBD01-01*01 | TCRBJ02-02*01 |
| 221 | CSVFQERGRRGELFF  | 2 | 0.00012 | TCRBV29-01*01 | unresolved    | TCRBJ02-02*01 |
| 222 | CSVFQDRGSSGEQYF  | 2 | 0.00012 | TCRBV29-01*01 | TCRBD01-01*01 | TCRBJ02-07*01 |
| 223 | CSVFQDRGRRGVLFF  | 2 | 0.00012 | TCRBV29-01*01 | TCRBD01-01*01 | TCRBJ02-02*01 |
| 224 | CSVFQDRGSSGELFS  | 2 | 0.00012 | TCRBV29-01*01 | TCRBD01-01*01 | TCRBJ01-03*01 |
| 225 | CSIFQGRGSSGELFF  | 2 | 0.00012 | TCRBV29-01*01 | TCRBD01-01*01 | TCRBJ02-02*01 |
| 226 | CSVF*DRGSSGELLF  | 2 | 0.00012 | TCRBV29-01*01 | TCRBD01-01*01 | TCRBJ02-02*01 |
| 227 | CSVFRDRGSSGELLF  | 2 | 0.00012 | TCRBV29-01*01 | TCRBD01-01*01 | TCRBJ02-02*01 |
| 228 | CSVFQDRGSSGELFL  | 2 | 0.00012 | TCRBV29-01*01 | TCRBD01-01*01 | TCRBJ02-02*01 |

|     |                   |   |         |               |               |               |
|-----|-------------------|---|---------|---------------|---------------|---------------|
| 229 | CSVFQGRGSSGVLFF   | 2 | 0.00012 | TCRBV29-01*01 | TCRBD02-01*01 | TCRBJ02-02*01 |
| 230 | CSVFQDRGNSGELFL   | 2 | 0.00012 | TCRBV29-01*01 | TCRBD01-01*01 | TCRBJ02-02*01 |
| 231 | CSIFQDRGSSGELFL   | 2 | 0.00012 | TCRBV29-01*01 | TCRBD01-01*01 | TCRBJ02-02*01 |
| 232 | CSVFQDRGSSGEMFF   | 2 | 0.00012 | TCRBV29-01*01 | TCRBD01-01*01 | TCRBJ02-02*01 |
| 233 | CSVFQDRGSSGELFS   | 2 | 0.00012 | TCRBV29-01*01 | TCRBD01-01*01 | TCRBJ02-02*01 |
| 234 | CSVLQDRGSSGELFS   | 2 | 0.00012 | TCRBV29-01*01 | TCRBD01-01*01 | TCRBJ02-02*01 |
| 235 | CSVFQDRGSSGELSF   | 2 | 0.00012 | TCRBV29-01*01 | TCRBD01-01*01 | TCRBJ02-02*01 |
| 236 | CGVEISKGTGNYGYTF  | 2 | 0.00012 | TCRBV29-01*01 | TCRBD01-01*01 | TCRBJ01-02*01 |
| 237 | CSAEISKGTGNYGCTF  | 2 | 0.00012 | TCRBV29-01*01 | TCRBD01-01*01 | TCRBJ01-02*01 |
| 238 | CSVEIPKGTGKYGYTL  | 2 | 0.00012 | TCRBV29-01*01 | TCRBD01-01*01 | TCRBJ01-02*01 |
| 239 | CSVEIPKGTGNYGYTL  | 2 | 0.00012 | TCRBV29-01*01 | TCRBD01-01*01 | TCRBJ01-02*01 |
| 240 | CSVEISKGTGNYGHTF  | 2 | 0.00012 | TCRBV29-01*01 | TCRBD01-01*01 | TCRBJ01-02*01 |
| 241 | SSAQGLAGGHVDEQFF  | 2 | 0.00012 | TCRBV20       | TCRBD02-01*01 | TCRBJ02-01*01 |
| 242 | CGAQGLAGGHVDEQFF  | 2 | 0.00012 | TCRBV20       | TCRBD02-01*01 | TCRBJ02-01*01 |
| 243 | CSAQGLAGGHVDGQFF  | 2 | 0.00012 | TCRBV20       | TCRBD02-01*01 | TCRBJ02-01*01 |
| 244 | CSAQGLAGGRVDGQFF  | 2 | 0.00012 | TCRBV20       | TCRBD02-01*01 | TCRBJ02-01*01 |
| 245 | CSAQGQAGGHVDEQFF  | 2 | 0.00012 | TCRBV20       | TCRBD02-01*01 | TCRBJ02-01*01 |
| 246 | CTAQGLAEGHVDEQFF  | 2 | 0.00012 | TCRBV20       | TCRBD02-01    | TCRBJ02-01*01 |
| 247 | CSVEISKGTGNYGYAF  | 2 | 0.00012 | TCRBV29-01*01 | TCRBD01-01*01 | TCRBJ01-02*01 |
| 248 | CSVEISKGTGNYGCTF  | 2 | 0.00012 | TCRBV29-01*01 | TCRBD01-01*01 | TCRBJ01-02*01 |
| 249 | CSTQGLAGGHVGEQFF  | 2 | 0.00012 | TCRBV20       | TCRBD02-01*01 | TCRBJ02-01*01 |
| 250 | CSPQGP TGGHVDEQFF | 2 | 0.00012 | TCRBV20       | TCRBD02-01*01 | TCRBJ02-01*01 |
| 251 | CSLQGLAGGHVDEQLF  | 2 | 0.00012 | TCRBV20       | TCRBD02-01*01 | TCRBJ02-01*01 |
| 252 | CSAQGLAGGHVDGQYF  | 2 | 0.00012 | TCRBV20       | TCRBD02-01*01 | TCRBJ02-07*01 |
| 253 | CSAQGLAGGHVADQFF  | 2 | 0.00012 | TCRBV20       | TCRBD02-01*01 | TCRBJ02-01*01 |
| 254 | CSAQGLVGGHVDEQFF  | 2 | 0.00012 | TCRBV20       | TCRBD02-01*01 | TCRBJ02-01*01 |
| 255 | CSARGLAGGRVDEQFF  | 2 | 0.00012 | TCRBV20       | TCRBD02-01    | TCRBJ02-01*01 |
| 256 | CSVEISKGTGSYGYTF  | 2 | 0.00012 | TCRBV20       | TCRBD01-01*01 | TCRBJ01-02*01 |
| 257 | CSAQGLAGGHVDKQFF  | 2 | 0.00012 | TCRBV20       | TCRBD02-01*01 | TCRBJ02-01*01 |
| 258 | CSAQGLAGGHVDGQFS  | 2 | 0.00012 | TCRBV20       | TCRBD02-01*01 | TCRBJ02       |
| 259 | CSPQGLAGGHVDEQSF  | 2 | 0.00012 | TCRBV20       | TCRBD02-01*01 | TCRBJ02       |
| 260 | CSVEISKGTGNYGYSF  | 2 | 0.00012 | TCRBV29-01*01 | TCRBD01-01*01 | TCRBJ01-02*01 |
| 261 | CASNGGLGTNEQYF    | 2 | 0.00012 | TCRBV02-01*01 | TCRBD02-01    | TCRBJ02-07*01 |

|     |                     |   |         |               |               |               |
|-----|---------------------|---|---------|---------------|---------------|---------------|
| 262 | WASSEGGYNSPLHL      | 2 | 0.00012 | TCRBV02-01*01 | TCRBD02-01*01 | TCRBJ01-06*01 |
| 263 | CASGEGG*NSPLHF      | 2 | 0.00012 | TCRBV02-01*01 | TCRBD02-01    | TCRBJ01-06*01 |
| 264 | RSVFQGLAGGHVDEQFF   | 2 | 0.00012 | TCRBV29-01*01 | TCRBD02-01*01 | TCRBJ02-01*01 |
| 265 | CASSQDQWTDTOYF      | 2 | 0.00012 | TCRBV04-01*01 | TCRBD01-01*01 | TCRBJ02-03*01 |
| 266 | CASPPSGVGTDTQYF     | 2 | 0.00012 | TCRBV12       | TCRBD02-01*02 | TCRBJ02-03*01 |
| 267 | CSVFQGRGLAGGHVDEQFF | 2 | 0.00012 | TCRBV29-01*01 | TCRBD02-01*01 | TCRBJ02-01*01 |
| 268 | CASSLGQADQYF        | 2 | 0.00012 | TCRBV05-04*01 | TCRBD01-01*01 | TCRBJ02-07*01 |
| 269 | CSASEGVYKQYF        | 2 | 0.00012 | TCRBV20       | TCRBD01-01*01 | TCRBJ02-07*01 |
| 270 | YSASEGVYEQYF        | 2 | 0.00012 | TCRBV20       | TCRBD01-01*01 | TCRBJ02-07*01 |
| 271 | RSASEGVYELYF        | 2 | 0.00012 | TCRBV20       | TCRBD01-01*01 | TCRBJ02-07*01 |
| 272 | CSASKGVYGQYF        | 2 | 0.00012 | TCRBV20       | TCRBD01-01*01 | TCRBJ02-07*01 |
| 273 | CGASEGVYEQYF        | 2 | 0.00012 | TCRBV20       | TCRBD01-01*01 | TCRBJ01-02*01 |
| 274 | CSASKGVYEQYF        | 2 | 0.00012 | TCRBV20       | TCRBD01-01*01 | TCRBJ02-07*01 |
| 275 | CSASEGVYERYL        | 2 | 0.00012 | TCRBV20       | TCRBD01-01*01 | TCRBJ02-07*01 |
| 276 | CSASEGVYGQCF        | 2 | 0.00012 | TCRBV20       | TCRBD01-01*01 | TCRBJ02-07*01 |
| 277 | CSVSEGVYEQYF        | 2 | 0.00012 | TCRBV20       | TCRBD01-01*01 | TCRBJ02-07*01 |
| 278 | CSASEGVYERYF        | 2 | 0.00012 | TCRBV20       | TCRBD01-01*01 | TCRBJ02-07*01 |
| 279 | CSVSEGVYGQYF        | 2 | 0.00012 | TCRBV20       | TCRBD01-01*01 | TCRBJ02-07*01 |
| 280 | CSAHERVYEQYF        | 2 | 0.00012 | TCRBV20       | TCRBD02-01*02 | TCRBJ02-07*01 |
| 281 | CSGSEGVHEQYY        | 2 | 0.00012 | TCRBV20       | TCRBD01-01*01 | TCRBJ02-07*01 |
| 282 | CGASEGV*EQYF        | 2 | 0.00012 | TCRBV20       | TCRBD01-01*01 | TCRBJ02-07*01 |
| 283 | RSASVGVYEQYF        | 2 | 0.00012 | TCRBV20       | unresolved    | TCRBJ02-07*01 |
| 284 | CGTSEGVYEQYF        | 2 | 0.00012 | TCRBV20       | TCRBD01-01*01 | TCRBJ02-07*01 |
| 285 | CSANEGVYGQYF        | 2 | 0.00012 | TCRBV20       | TCRBD01-01*01 | TCRBJ02-07*01 |
| 286 | CSASEGVYE*YF        | 2 | 0.00012 | TCRBV20       | TCRBD01-01*01 | TCRBJ02-07*01 |
| 287 | CSASEGVYG*YF        | 2 | 0.00012 | TCRBV20       | TCRBD01-01*01 | TCRBJ02-07*01 |
| 288 | CSASEGAYEQYL        | 2 | 0.00012 | TCRBV20       | TCRBD01-01*01 | TCRBJ02-07*01 |
| 289 | CSASEGVYKQYF        | 2 | 0.00012 | TCRBV20       | TCRBD01-01*01 | TCRBJ02-07*01 |
| 290 | CCASEGVYEQYF        | 2 | 0.00012 | TCRBV20       | TCRBD01-01*01 | TCRBJ02-07*01 |
| 291 | RSASEGVYEQYF        | 2 | 0.00012 | TCRBV20       | TCRBD01-01*01 | TCRBJ02-05*01 |
| 292 | RSASEGVYEQYF        | 2 | 0.00012 | TCRBV20       | TCRBD01-01*01 | TCRBJ02-07*01 |
| 293 | CSASEGVYEQYS        | 2 | 0.00012 | TCRBV20       | TCRBD01-01*01 | TCRBJ02-07*01 |
| 294 | YSASEGVYEQYF        | 2 | 0.00012 | TCRBV20       | TCRBD01-01*01 | TCRBJ02-07*01 |

|     |                   |   |         |               |               |               |
|-----|-------------------|---|---------|---------------|---------------|---------------|
| 295 | CSTSEGVYEQYF      | 2 | 0.00012 | TCRBV20       | TCRBD01-01*01 | TCRBJ02-07*01 |
| 296 | CSASEGVYEKYF      | 2 | 0.00012 | TCRBV20       | TCRBD01-01*01 | TCRBJ02-07*01 |
| 297 | CSASEGVYE*YF      | 2 | 0.00012 | TCRBV20       | TCRBD01-01*01 | TCRBJ02-07*01 |
| 298 | CGASEGVYEQCF      | 2 | 0.00012 | TCRBV20       | TCRBD01-01*01 | TCRBJ02-07*01 |
| 299 | CSASEGVYERY       | 2 | 0.00012 | TCRBV20       | TCRBD01-01*01 | TCRBJ02-07*01 |
| 300 | SSASEGVYEQYF      | 2 | 0.00012 | TCRBV20       | TCRBD01-01*01 | TCRBJ02-07*01 |
| 301 | CASSELAGFYDQYF    | 2 | 0.00012 | TCRBV06-01*01 | TCRBD02-01*01 | TCRBJ02-07*01 |
| 302 | CSVENSKGTENYGYTF  | 2 | 0.00012 | TCRBV29-01*01 | TCRBD01-01*01 | TCRBJ01-02*01 |
| 303 | CSASEGLAGGHIDEQFF | 2 | 0.00012 | TCRBV20       | TCRBD02-01*01 | TCRBJ02-01*01 |
| 304 | CSAAQGLAGGHVDEQFF | 2 | 0.00012 | TCRBV20       | TCRBD02-01*01 | TCRBJ02-01*01 |
| 305 | CSVLQDRGSSGEPFF   | 2 | 0.00012 | TCRBV29-01*01 | TCRBD01-01*01 | TCRBJ02-02*01 |
| 306 | CSVFQDGGSSGELFF   | 2 | 0.00012 | TCRBV29-01*01 | TCRBD02-01*01 | TCRBJ02-02*01 |
| 307 | CASSLSRVSWGYTF    | 2 | 0.00012 | TCRBV05-06*01 | unresolved    | TCRBJ01-02*01 |
| 308 | CASSLGRVSRGYTF    | 2 | 0.00012 | TCRBV05-06*01 | TCRBD01-01*01 | TCRBJ01-02*01 |
| 309 | CSAQGLAGVYGQYF    | 2 | 0.00012 | TCRBV20       | TCRBD02-01*01 | TCRBJ02-07*01 |
| 310 | CSVVAFGSPYGYTF    | 2 | 0.00012 | TCRBV29-01*01 | unresolved    | TCRBJ01-02*01 |
| 311 | WASSYSFEPAQETQDF  | 2 | 0.00012 | TCRBV06-05*01 | TCRBD01-01*01 | TCRBJ02-05*01 |
| 312 | CSVLQDRGSSGGLFF   | 2 | 0.00012 | TCRBV29-01*01 | TCRBD01-01*01 | TCRBJ02-02*01 |

Supplementary Table 3. Summary of T Cell Clones generated from the CSF

| Vb    | cells seeded | well  | CDR3            | L-III | L-I | L-II | MEMORY |            | TCC         | TCC frequency among CSF cells  |
|-------|--------------|-------|-----------------|-------|-----|------|--------|------------|-------------|--------------------------------|
|       |              |       |                 |       |     |      | CD4    | CD8        |             | expressing identical Vb family |
| Vb2   | 90           | 2-2   | CSARAERGGPEQFF  | no    | no  | no   | no     | yes        | TCC 2-2     | 66.66%                         |
|       |              | 2-3   | CSARAERGGPEQFF  | no    | no  | no   | no     | yes        |             |                                |
|       |              | 2-1   | CSARVRGGGELFF   | no    | no  | no   | no     | no         | TCC 2-1     | 33.33%                         |
| Vb4   | 90           | 4.1   | CSVIAFGSPYGYTF  | yes   | no  | no   | no     | yes        | TCC 4-1     | 100.00%                        |
|       |              | 4.2   | CSVIAFGSPYGYTF  | yes   | no  | no   | no     | yes        |             |                                |
|       |              | 4.4   | CSVIAFGSPYGYTF  | yes   | no  | no   | no     | yes        |             |                                |
|       |              | 4.10  | CSVIAFGSPYGYTF  | yes   | no  | no   | no     | yes        |             |                                |
|       |              | 4.11  | CSVIAFGSPYGYTF  | yes   | no  | no   | no     | yes        |             |                                |
| Vb5.2 | 162          | 5.2-6 | CASSLGRVSWGTYF  | yes   | no  | no   | yes    | no         | TCC 5.2-1   | 100.00%                        |
|       |              | 5.2-7 | CASSLGRVSWGTYF  | yes   | no  | no   | yes    | no         |             |                                |
| Vb7   | 234          | 7.2   | CASSRRQGHTEAFF  | yes   | no  | no   | no     | yes        | TCC 7-2     | 60.00%                         |
|       |              | 7.6   | CASSRRQGHTEAFF  | yes   | no  | no   | no     | yes        |             |                                |
|       |              | 7.7   | CASSRRQGHTEAFF  | yes   | no  | no   | no     | yes        |             |                                |
|       |              | 7.102 | CASSRRQGHTEAFF  | yes   | no  | no   | no     | yes        |             |                                |
|       |              | 7.5   | CASSQALWGYEQYF  | yes   | no  | no   | no     | no         | TCC 7-5     | 20.00%                         |
| Vb8   | 252          | 8-2   | CASASGTRDVGEQFF | yes   | no  | no   | no     | no         | TCC 8.1-2   | 41.17%                         |
|       |              | 8-6   | CASASGTRDVGEQFF | yes   | no  | no   | no     | no         |             |                                |
|       |              | 8-11  | CASASGTRDVGEQFF | yes   | no  | no   | no     | no         |             |                                |
|       |              | 8-25  | CASASGTRDVGEQFF | yes   | no  | no   | no     | no         |             |                                |
|       |              | 8-4   | CASASGTRDVGEQFF | yes   | no  | no   | no     | no         |             |                                |
|       |              | 8-12  | CASASGTRDVGEQFF | yes   | no  | no   | no     | no         |             |                                |
|       |              | 8-40  | CASASGTRDVGEQFF | yes   | no  | no   | no     | no         |             |                                |
|       |              | 8-101 | CASTPSGVGTDQYF  | yes   | no  | no   | no     | no         | TCC 8.1-101 | 17.60%                         |
|       |              | 8-103 | CASTPSGVGTDQYF  | yes   | no  | no   | no     | no         |             |                                |
|       |              | 8-105 | CASTPSGVGTDQYF  | yes   | no  | no   | no     | no         |             |                                |
|       |              | 8-23  | CASSVGRWXEXFF   | no    | no  | no   | no     | TCC 8.1-23 | 5.88%       |                                |



|        |     |          |                   |     |     |     |     |     |             |        |
|--------|-----|----------|-------------------|-----|-----|-----|-----|-----|-------------|--------|
|        |     | 8-20     | CASSSYKRTGGADTQYF | no  | no  | no  | no  | no  | TCC 8.1-20  | 5.88%  |
|        |     | 8-27     | CASSSRGNXEAFF     | no  | no  | no  | no  | no  | TCC 8.1-27  | 5.88%  |
|        |     | 8-29     | CASSFQGMNTEAFF    | no  | no  | no  | no  | no  | TCC 8.1-29  | 5.88%  |
|        |     | 8-35     | CASSPSMGDGYTF     | yes | no  | no  | no  | no  | TCC 8.1-35  | 5.88%  |
|        |     | 8-36     | CASSFYTPEAFF      | no  | no  | no  | no  | no  | TCC 8.1-36  | 5.88%  |
|        |     | 8-39     | CASSXKSYEQSSG     | no  | no  | no  | no  | no  | TCC 8.1-39  | 5.88%  |
| Vb13.1 | 198 | 13.12    | CASSYSFEPAQETQYF  | yes | no  | no  | no  | no  | TCC13.1-12  | 33.33% |
|        |     | 13.13    | CASSELAGFYEQYF    | yes | yes | no  | no  | yes | TCC13.1-13  | 33.33% |
|        |     | 13.1-2   | CASSYHGQGRTGELFF  | no  | no  | no  | no  | no  | TCC13.1-1-2 | 33.33% |
| Vb17   | 270 | Vb17-3   | CASRAGNTEAFF      | yes | no  | yes | no  | no  | TCC 17-2    | 46.30% |
|        |     | Vb17-40  | CASRAGNTEAFF      | yes | no  | yes | no  | no  |             |        |
|        |     | Vb17-45  | CASRAGNTEAFF      | yes | no  | yes | no  | no  |             |        |
|        |     | Vb17-22  | CASRAGNTEAFF      | yes | no  | yes | no  | no  |             |        |
|        |     | Vb17-23  | CASRAGNTEAFF      | yes | no  | yes | no  | no  |             |        |
|        |     | Vb17-25  | CASRAGNTEAFF      | yes | no  | yes | no  | no  |             |        |
|        |     | Vb17-27  | CASRAGNTEAFF      | yes | no  | yes | no  | no  |             |        |
|        |     | Vb17-41  | CASRAGNTEAFF      | yes | no  | yes | no  | no  |             |        |
|        |     | well2    | CASRAGNTEAFF      | yes | no  | yes | no  | no  |             |        |
|        |     | well5    | CASRAGNTEAFF      | yes | no  | yes | no  | no  |             |        |
|        |     | well6    | CASRAGNTEAFF      | yes | no  | yes | no  | no  |             |        |
|        |     | well17-1 | CASRAGNTEAFF      | yes | no  | yes | no  | no  |             |        |
|        |     | well17-A | CASRAGNTEAFF      | yes | no  | yes | no  | no  |             |        |
|        |     | well17-B | CASRAGNTEAFF      | yes | no  | yes | no  | no  |             |        |
|        |     | well17-C | CASRAGNTEAFF      | yes | no  | yes | no  | no  |             |        |
|        |     | well12   | CASRAGNTEAFF      | yes | no  | yes | no  | no  |             |        |
|        |     | well17-H | CASRAGNTEAFF      | yes | no  | yes | no  | no  |             |        |
|        |     | well17-K | CASRAGNTEAFF      | yes | no  | yes | no  | no  |             |        |
|        |     | well17-G | CASRAGNTEAFF      | yes | no  | yes | no  | no  |             |        |
|        |     | well17-M | CASSIWSRSEKLFF    | no  | no  | no  | yes | no  | TCC 17-17M  | 17.00% |
|        |     | well3    | CASSIWSRSEKLFF    | no  | no  | no  | yes | no  |             |        |

|      |     |           |                  |     |     |     |     |    |           |        |
|------|-----|-----------|------------------|-----|-----|-----|-----|----|-----------|--------|
|      |     | well4     | CASSIWSPRSEKLFF  | no  | no  | no  | yes | no |           |        |
|      |     | well7     | CASSIWSPRSEKLFF  | no  | no  | no  | yes | no |           |        |
|      |     | well9     | CASSIWSPRSEKLFF  | no  | no  | no  | yes | no |           |        |
|      |     | well10    | CASSIWSPRSEKLFF  | no  | no  | no  | yes | no |           |        |
|      |     | well13    | CASSIWSPRSEKLFF  | no  | no  | no  | yes | no |           |        |
|      |     | Vb17-31   | CASSEAGWPQHF     | yes | no  | no  | no  | no | TCC 17-6  | 14.60% |
|      |     | Vb17-4    | CASSEAGWPQHF     | yes | no  | no  | no  | no |           |        |
|      |     | Vb17-10   | CASSEAGWPQHF     | yes | no  | no  | no  | no |           |        |
|      |     | Vb17-21   | CASSEAGWPQHF     | yes | no  | no  | no  | no |           |        |
|      |     | Vb17-28   | CASSEAGWPQHF     | yes | no  | no  | no  | no |           |        |
|      |     | Vb17-29   | CASSEAGWPQHF     | yes | no  | no  | no  | no |           |        |
|      |     | Vb17-33   | CASAWTVSYEQYF    | no  | no  | no  | no  | no | TCC 17-33 | 9.80%  |
|      |     | Vb17-8    | CASAWTVSYEQYF    | no  | no  | no  | no  | no |           |        |
|      |     | Vb17-26   | CASAWTVSYEQYF    | no  | no  | no  | no  | no |           |        |
|      |     | Vb17-39   | CASAWTVSYEQXF    | no  | no  | no  | no  | no |           |        |
|      |     | Vb17-37   | CASSIWVNTGELFF   | no  | no  | no  | no  | no | TCC 17-37 | 4.90%  |
|      |     | well17-F  | CASSIWVNTGELFF   | no  | no  | no  | no  | no |           |        |
|      |     | Vb17-2    | CASSIAGYGEQYF    | yes | no  | no  | no  | no | TCC 17-5  | 2.40%  |
|      |     | Vb17-47   | CASSLWTGDILKPQHF | no  | no  | no  | no  | no | TCC 17-47 | 2.40%  |
|      |     | Vb17-41   | CASSTLGGKYQPQHF  | yes | no  | yes | no  | no | TCC 17-1  | 2.40%  |
| Vb21 | 450 | Vb21-4    | CASSGRGPSYGTYF   | yes | yes | no  | no  | no | TCC 21-1  | 94.30% |
|      |     | Vb21-5    | CASSGRGPSYGTYF   | yes | 0   | no  | no  | no |           |        |
|      |     | Vb21-6    | CASSGRGPSYGTYF   | yes | yes | no  | no  | no |           |        |
|      |     | Vb21-9    | CASSGRGPSYGTYF   | yes | yes | no  | no  | no |           |        |
|      |     | Vb21-7    | CASSGRGPSYGTYF   | yes | yes | no  | no  | no |           |        |
|      |     | Vb21-13   | CASSGRGPSYGTYF   | yes | yes | no  | no  | no |           |        |
|      |     | Vb21-1    | CASSGRGPSYGTYF   | yes | yes | no  | no  | no |           |        |
|      |     | Vb21-2    | CASSGRGPSYGTYF   | yes | yes | no  | no  | no |           |        |
|      |     | Vb21-3    | CASSGRGPSYGTYF   | yes | yes | no  | no  | no |           |        |
|      |     | well 21.1 | CASSGRGPSYGTYF   | yes | yes | no  | no  | no |           |        |
|      |     | well 21.2 | CASSGRGPSYGTYF   | yes | yes | no  | no  | no |           |        |
|      |     | well 21.3 | CASSGRGPSYGTYF   | yes | yes | no  | no  | no |           |        |
|      |     | well 21.4 | CASSGRGPSYGTYF   | yes | yes | no  | no  | no |           |        |

|      |     |            |                 |     |     |    |    |    |          |        |
|------|-----|------------|-----------------|-----|-----|----|----|----|----------|--------|
|      |     | well 21.5  | CASSGRGPSYGYTF  | yes | yes | no | no | no |          |        |
|      |     | well 21.6  | CASSGRGPSYGYTF  | yes | yes | no | no | no |          |        |
|      |     | well 21.7  | CASSGRGPSYGYTF  | yes | yes | no | no | no |          |        |
|      |     | well 21.8  | CASSGRGPSYGYTF  | yes | yes | no | no | no |          |        |
|      |     | well 21.9  | CASSGRGPSYGYTF  | yes | yes | no | no | no |          |        |
|      |     | well 21.10 | CASSGRGPSYGYTF  | yes | yes | no | no | no |          |        |
|      |     | well 21.11 | CASSGRGPSYGYTF  | yes | yes | no | no | no |          |        |
|      |     | well 21.12 | CASSGRGPSYGYTF  | yes | yes | no | no | no |          |        |
|      |     | well 21.13 | CASSGRGPSYGYTF  | yes | yes | no | no | no |          |        |
|      |     | well 21.14 | CASSGRGPSYGYTF  | yes | yes | no | no | no |          |        |
|      |     | well 21.15 | CASSGRGPSYGYTF  | yes | yes | no | no | no |          |        |
|      |     | well 21.16 | CASSGRGPSYGYTF  | yes | yes | no | no | no |          |        |
|      |     | well 21.17 | CASSGRGPSYGYTF  | yes | yes | no | no | no |          |        |
|      |     | well 21.18 | CASSGRGPSYGYTF  | yes | yes | no | no | no |          |        |
|      |     | well 21.19 | CASSGRGPSYGYTF  | yes | yes | no | no | no |          |        |
|      |     | well 21.21 | CASSGRGPSYGYTF  | yes | yes | no | no | no |          |        |
|      |     | well 21.22 | CASSGRGPSYGYTF  | yes | yes | no | no | no |          |        |
|      |     | well 21.23 | CASSGRGPSYGYTF  | yes | yes | no | no | no |          |        |
|      |     | well 21.24 | CASSGRGPSYGYTF  | yes | yes | no | no | no |          |        |
|      |     | 21-2       | CASSGRGPSYGYTF  | yes | yes | no | no | no |          |        |
|      |     | Vb'21-10   | CASSLIVRDTQYF   | no  | no  | no | no | no | TCC 21-2 | 5.70%  |
|      |     | Vb21-11    | CASSLIVRDTQYF   | no  | no  | no | no | no |          |        |
| Vb22 | 228 | well6      | CASKDGTGRLYEQYF | yes | no  | no | no | no | TCC 22-1 | 70.00% |
|      |     | well7      | CASKDGTGRLYEQYF | yes | no  | no | no | no |          |        |
|      |     | well12     | CASKDGTGRLYEQYF | yes | no  | no | no | no |          |        |
|      |     | well13     | CASKDGTGRLYEQYF | yes | no  | no | no | no |          |        |
|      |     | 22-1       | CASKDGTGRLYEQYF | yes | no  | no | no | no |          |        |
|      |     | 22-2       | CASKDGTGRLYEQYF | yes | no  | no | no | no |          |        |
|      |     | 22-3       | CASKDGTGRLYEQYF | yes | no  | no | no | no |          |        |
|      |     | well 12    | CASEQGYILAHEQYF | yes | no  | no | no | no | TCC 22-2 | 10.00% |
|      |     | 22-4       | CASSETRYSNQPQHF | no  | no  | no | no | no | TCC 22-4 | 10.00% |
|      |     | 22-5       | CASSEAGMGSFHF   | no  | no  | no | no | no | TCC 22-5 | 10.00% |
| Vb3  | 90  | 3-1        | CASSSLGYGYTF    | no  | no  | no | no | no | TCC 3-1  | 71.40% |

|      |    |       |                 |    |    |    |    |    |           |        |
|------|----|-------|-----------------|----|----|----|----|----|-----------|--------|
|      |    | 3-3   | CASSSLGYGYTF    | no | no | no | no | no |           |        |
|      |    | 3-4   | CASSSLGYGYXF    | no | no | no | no | no |           |        |
|      |    | 3-5   | CASSSLGYGYTF    | no | no | no | no | no |           |        |
|      |    | 3-6   | CASSSLGYGYTF    | no | no | no | no | no |           |        |
|      |    | 3-7   | CASSSLGYGYTF    | no | no | no | no | no |           |        |
|      |    | 3-8   | CASSSLGYGYTF    | no | no | no | no | no |           |        |
|      |    | 3-9   | CASSSLGYGYTF    | no | no | no | no | no |           |        |
|      |    | 3-13  | CASSSLGYGYTF    | no | no | no | no | no |           |        |
|      |    | 3-14  | CASSSLGYGYTF    | no | no | no | no | no |           |        |
|      |    |       |                 |    |    |    |    |    |           |        |
|      |    | 3-11  | CASSSLGDGYTF    | no | no | no | no | no | TCC 3-11  | 7.10%  |
|      |    |       |                 |    |    |    |    |    |           |        |
|      |    | 3-10  | CASTPGGDPGELFF  | no | no | no | no | no | TCC 3-10  | 7.10%  |
|      |    |       |                 |    |    |    |    |    |           |        |
|      |    | 3-12  | CASSSXRLWLHLRF  | no | no | no | no | no | TCC 3-12  | 7.10%  |
|      |    |       |                 |    |    |    |    |    |           |        |
|      |    | 3-15  | XXXXXGGYTGELEFF | no | no | no | no | no | TCC 3-15  | 7.10%  |
|      |    |       |                 |    |    |    |    |    |           |        |
| Vb12 | 90 | 12-6  | CAISEGQVQETQYF  | no | no | no | no | no | TCC 12-6  | 57.14% |
|      |    | 12-8  | CAISEGQVQETQYF  | no | no | no | no | no |           |        |
|      |    | 12-21 | CAISEGQVQETQYF  | no | no | no | no | no |           |        |
|      |    | 12-24 | CAISEGQVQETQYF  | no | no | no | no | no |           |        |
|      |    |       |                 |    |    |    |    |    |           |        |
|      |    | 12-2  | CAITSGLMNTEAFF  | no | no | no | no | no | TCC 12-2  | 14.28% |
|      |    |       |                 |    |    |    |    |    |           |        |
|      |    | 12-14 | CAISDKSEGGYTF   | no | no | no | no | no | TCC 12-14 | 14.28% |
|      |    |       |                 |    |    |    |    |    |           |        |
|      |    | 12-30 | CAGAAGTGANVLTF  | no | no | no | no | no | TCC 12-30 | 14.28% |
|      |    |       |                 |    |    |    |    |    |           |        |

X are unknown amino acids. In sequences with unknown amino acids only the known part of the sequences has been alligned in order to identify T cell clones. Since not matched sequences have been identified in any lesion, the T cell clones have not been fully sequenced.

## Supplementary Table 4. Silent Nucleotide exchanges in the CDR3 sequence

| RANK | COUNTS       | CDR3                                         |                                                                            | synonymous substitutions                                      | V             | D             | J             |
|------|--------------|----------------------------------------------|----------------------------------------------------------------------------|---------------------------------------------------------------|---------------|---------------|---------------|
|      |              | Aminoacid sequence                           | Nucleotide sequence                                                        |                                                               |               |               |               |
| 1    | 492257       | CSASEGVYEQYF                                 | <b>TGCAGTGCTAGT</b> <u>GAGGGGGTTT</u> <b>TACGAGCAGTACTTC</b>               | GCT = A AGT = S GAG = E GTT = V TAC = Y TTC = F               | TCRBV20       | TCRBD01-01*01 | TCRBJ02-07*01 |
|      |              | 4 CSASEGVYEQYF                               | TGCAGTGCTAG <u>C</u> GAGGGGGTTTACGAGCAGTACTTC                              | GCT = A <u>AGC</u> = S GAG = E GTT = V TAC = Y TTC = F        | TCRBV20       | TCRBD01-01*01 | TCRBJ02-07*01 |
|      |              | 3 CSASEGVYEQYF                               | TGCAGTGCTAGT <u>GAGGGGGTCT</u> ACGAGCAGTACT <u>TTT</u>                     | GCT = A AGT = S GAG = E <u>GTC</u> = V TAC = Y <u>TTT</u> = F | TCRBV20       | TCRBD01-01*01 | TCRBJ02-07*01 |
|      |              | 3 CSASEGVYEQYF                               | TGCAGTGCTAGT <u>GAGGGGGTTA</u> TGAGCAGTACTTC                               | GCT = A AGT = S GAG = E GTT = V <u>TAT</u> = Y TTC = F        | TCRBV20       | TCRBD01-01*01 | TCRBJ02-07*01 |
|      |              | 3 CSASEGVYEQYF                               | TGCAGTGCTAGT <u>GA</u> AGGGGGTCTACGAGCAGTACTTC                             | GCT = A AGT = S <u>GAA</u> = E <u>GTC</u> = V TAC = Y TTC = F | TCRBV20       | TCRBD01-01*01 | TCRBJ02-07*01 |
| 2    | CSASEGVYEQYF | TGCAGT <u>GC</u> AGTGAGGGGGTCTACGAGCAGTACTTC | <u>GCC</u> = A AGT = S GAG = E <u>GTC</u> = V TAC = Y TTC = F              | TCRBV20                                                       | TCRBD01-01*01 | TCRBJ02-07*01 |               |
| 3    | 251732       | CSVEISKGTGNYGYTF                             | <b>TGCAGCGTTGAAATTCGA</b> <u>AGGGGACAGGGA</u> <b>ACTATGGCTACACCTTC</b>     | GTT = V ATT = I TCG = S ACA = T TAT = Y                       | TCRBV29-01*01 | TCRBD01-01*01 | TCRBJ01-02*01 |
|      |              | 2 CSVEISKGTGNYGYTF                           | TGCAGCGTTGAGATTT <u>CGA</u> AGGGGACAGGGA <u>ACTA</u> CGGCTACACCTTC         | GTT = V ATT = I TCG = S ACA = T <u>TAC</u> = Y                | TCRBV29-01*01 | TCRBD01-01*01 | TCRBJ01-02*01 |
|      |              | 2 CSVEISKGTGNYGYTF                           | TGCAGCGTTGAAAT <u>CT</u> CGAAGGGGACGGGA <u>ACTAT</u> GGCTACACCTTC          | GTT = V ATC = I TCG = S <u>ACG</u> = T TAT = Y                | TCRBV29-01*01 | unresolved    | TCRBJ01-02*01 |
|      |              | 2 CSVEISKGTGNYGYTF                           | TGCAGCGTTGAAATTT <u>CA</u> AGGGGACAGGGA <u>ACTAT</u> GGCTACACCTTC          | GTT = V ATT = I <u>TCA</u> = S ACA = T TAT = Y                | TCRBV29-01*01 | TCRBD01-01*01 | TCRBJ01-02*01 |
|      |              | 2 CSVEISKGTGNYGYTF                           | TGCAGCGT <u>CG</u> AATTT <u>CGA</u> AGGGGACAGGGA <u>ACTAT</u> GGCTACACCTTC | <u>GTC</u> = V ATT = I TCG = S ACA = T TAT = Y                | TCRBV29-01*01 | TCRBD01-01*01 | TCRBJ01-02*01 |
| 4    | 169280       | CSVFQDRGSSGELFF                              | <b>TGCAGCGTTTTCCAGGACAGGGGAAGCAGCGGGGAGCTGTTTTTT</b>                       | CTG = L                                                       | TCRBV29-01*01 | TCRBD01-01*01 | TCRBJ02-02*01 |
|      |              | 2 CSVFQDRGSSGELFF                            | TGCAGCGTTTTCCAGGACAGGGGAAGCAGCGGGGAGCT <u>TTTTTTT</u>                      | <u>CTT</u> = L                                                | TCRBV29-01*01 | TCRBD01-01*01 | TCRBJ02-02*01 |
| 5    | 111143       | CSAQLAGGHVDEQFF                              | <b>TGCAGTGCTCAGGGACTAGCGGGGGGCACGTAGATGAGCAGTCTTTC</b>                     | CAC = H TTC = F TTC = F                                       | TCRBV20       | TCRBD02-01*01 | TCRBJ02-01*01 |
|      |              | 2 CSAQLAGGHVDEQFF                            | TGCAGTGCTCAGGGACTAGCGGGGGGGCA <u>TGT</u> AGATGAGCAGTCTTTC                  | <u>CAT</u> = H TTC = F TTC = F                                | TCRBV20       | TCRBD02-01*01 | TCRBJ02-01*01 |
|      |              | 3 CSAQLAGGHVDEQFF                            | TGCAGTGCTCAGGGACTAGCGGGGGGGCACGTAGACGAGCAGTCTT <u>TT</u>                   | CAC = H TTC = F <u>TTT</u> = F                                | TCRBV20       | TCRBD02-01*01 | TCRBJ02       |
|      |              | 2 CSAQLAGGHVDEQFF                            | TGCAGTGCTCAGGGACTAGCGGGGGGGCACGTAGACGAGCAGT <u>TTTTC</u>                   | CAC = H <u>TTT</u> = F TTC = F                                | TCRBV20       | TCRBD02-01*01 | TCRBJ02       |

Silent nucleotide exchanges are shown in red. Codons containing silent nucleotide exchanges are underlined.

**Supplementary Table 5. Comparison of TCRBV CDR1 and CDR2 Aminoacid sequences from TCCs sharing identical CDR3 sequences**

| # CDR3 Shared | COUNTS |        | TCRBV  | CDR1          | CDR2               |                      |
|---------------|--------|--------|--------|---------------|--------------------|----------------------|
| 3             | 493497 | 8      | 111505 | TCRBV20       | D F <b>Q A T</b> T | S <b>N E G S K A</b> |
|               | 395    | 169488 | 31     | TCRBV29-01*01 | S <b>Q V T</b> M   | A <b>N Q G S E A</b> |
| 3             | 24987  | 13291  | 8219   | TCRBV05-06*01 | <b>S G H D T</b>   | <b>Y Y E E E E</b>   |
|               | 143    | 94     | 83     | TCRBV05-04*01 | <b>S G H N T</b>   | <b>Y Y R E E E</b>   |
| 2             | 6748   | 2394   |        | TCRBV12-04    | <b>S G H D Y</b>   | F N N N V P          |
|               | 4      | 4      |        | TCRBV05-06*01 | <b>S G H D T</b>   | Y Y E E E E          |
| 2             | 25295  | 4      |        | TCRBV02-01*01 | <b>S N H L Y</b>   | F Y <b>N N E I</b>   |
|               | 25     | 4790   |        | TCRBV12-04    | <b>S G H D Y</b>   | F N <b>N N V P</b>   |
| 1             | 25076  |        |        | TCRBV05-04*01 | <b>S G H N T</b>   | Y Y R E E E          |
|               | 9      |        |        | TCRBV12-03    | <b>S G H N S</b>   | F N N N V P          |
| 1             | 6936   |        |        | TCRBV06-01*01 | M N <b>H N S</b>   | S A <b>S E G T</b>   |
|               | 18     |        |        | TCRBV12-03    | S G <b>H N S</b>   | F N N N V P          |
| 1             | 5200   |        |        | TCRBV06-05*01 | M N <b>H E Y</b>   | S V G A G I          |
|               | 5      |        |        | TCRBV12-04    | S G <b>H D Y</b>   | F N N N V P          |
| 1             | 356183 |        |        | TCRBV05-06*01 | <b>S G H D T</b>   | <b>Y Y E E E E</b>   |
|               | 2070   |        |        | TCRBV05-04*01 | <b>S G H N T</b>   | <b>Y Y R E E E</b>   |
|               | 9      |        |        | TCRBV12-05    | L <b>G H N T</b>   | F R N R A P          |
|               | 4      |        |        | TCRBV04-02*01 | L <b>G H N A</b>   | Y N F K <b>E Q</b>   |
| 1             | 252110 |        |        | TCRBV29-01*01 | S <b>Q V T</b> M   | A <b>N Q G S E A</b> |
|               | 29     |        |        | TCRBV20       | D F <b>Q A T</b> T | S <b>N E G S K A</b> |
|               | 20     |        |        | TCRBV05-06*01 | S G H D <b>T</b>   | Y Y E E E <b>E</b>   |
| 1             | 81616  |        |        | TCRBV12-03    | <b>S G H N S</b>   | F N N N V P          |
|               | 17     |        |        | TCRBV06-01*01 | M N <b>H N S</b>   | S A <b>S E G T</b>   |
|               | 9      |        |        | TCRBV05-04*01 | <b>S G H N T</b>   | Y Y R E E E          |
|               | 7      |        |        | TCRBV02-01*01 | <b>S N H L Y</b>   | F Y <b>N N E I</b>   |
|               | 6      |        |        | TCRBV06-05*01 | M N <b>H E Y</b>   | S V G A G I          |

Identical aminoacids are shown in bold red and conservative substitutions in normal red. In grey are shown the T cell clones for which the specific allele is unknown. In these cases we have chosen the allele with CDR1 and CDR2 sequences more similar to that expressed by the other T cell clones sharing the CDR3 sequence.

Supplementary Table 6. Complete TCR sequencing in Lesion I and II

| RANK            | CDR3                    | FREQUENCY  |                   |                      | Also present in:     |                      |          |          |
|-----------------|-------------------------|------------|-------------------|----------------------|----------------------|----------------------|----------|----------|
|                 |                         | COUNTS     | (%)               | V                    | D                    | J                    | L-II     | L-III    |
| <b>Lesion I</b> |                         |            |                   |                      |                      |                      |          |          |
| <b>1</b>        | <b>CASNPGTAYSIEQYF</b>  | <b>264</b> | <b>5.51724138</b> | <b>TCRBV06-01*01</b> | <b>TCRBD01-01*01</b> | <b>TCRBJ02-07*01</b> | <b>X</b> | <b>X</b> |
| 2               | CASSQGTGGIGNSPLHF       | 247        | 5.16196447        | TCRBV06              | TCRBD01-01*01        | TCRBJ01-06*01        |          |          |
| 3               | CASSSAGYNTGELFF         | 164        | 3.42737722        | TCRBV06-06           | unresolved           | TCRBJ02-02*01        |          |          |
| 4               | CASSIQEWSTEAFF          | 158        | 3.30198537        | TCRBV19-01           | unresolved           | TCRBJ01-01*01        |          |          |
| 5               | CAIRTGSGDTEAFF          | 151        | 3.15569488        | TCRBV10-03*01        | TCRBD01-01*01        | TCRBJ01-01*01        |          |          |
| 6               | CAISEAGGRDTQYF          | 132        | 2.75862069        | TCRBV10-03*01        | TCRBD02-01*01        | TCRBJ02-03*01        |          |          |
| 7               | CASSRGRDRNTEAFF         | 130        | 2.71682341        | TCRBV05-01*01        | TCRBD01-01*01        | TCRBJ01-01*01        |          |          |
| 8               | CASRPTRVDTGELFF         | 125        | 2.6123302         | TCRBV28-01*01        | TCRBD02-01           | TCRBJ02-02*01        |          |          |
| 9               | CASSLFTGDEAFF           | 107        | 2.23615465        | TCRBV27-01*01        | TCRBD01-01*01        | TCRBJ01-01*01        |          |          |
| 10              | CASSWTNTEAFF            | 103        | 2.15256008        | TCRBV10-02*01        | unresolved           | TCRBJ01-01*01        |          |          |
| 11              | CASSPDDTQYF             | 101        | 2.1107628         | TCRBV18-01*01        | unresolved           | TCRBJ02-03*01        |          |          |
| 12              | CAIHQSGTSSVSYEQYF       | 98         | 2.04806688        | TCRBV10-03*01        | TCRBD02-01           | TCRBJ02-07*01        |          |          |
| 13              | CASSLLGEWNNEQFF         | 95         | 1.98537095        | TCRBV28-01*01        | unresolved           | TCRBJ02-01*01        |          |          |
| 14              | CASSESGYGYTF            | 93         | 1.94357367        | TCRBV19-01           | TCRBD01-01*01        | TCRBJ01-02*01        |          |          |
| 15              | CASSLFDRGGNEKLFF        | 91         | 1.90177638        | TCRBV28-01*01        | TCRBD02-01*02        | TCRBJ01-04*01        |          |          |
| <b>16</b>       | <b>CASSLYRGGTQYF</b>    | <b>90</b>  | <b>1.88087774</b> | <b>TCRBV05-06*01</b> | <b>TCRBD01-01*01</b> | <b>TCRBJ02-03*01</b> |          | <b>X</b> |
| 17              | CASSFPSTDTQYF           | 90         | 1.88087774        | TCRBV05-06*01        | TCRBD02-01*02        | TCRBJ02-03*01        |          |          |
| 18              | CASSYSGGYNEQFF          | 68         | 1.42110763        | TCRBV06              | TCRBD02-01*01        | TCRBJ02-01*01        |          |          |
| 19              | CASTLGQGYEQYF           | 66         | 1.37931034        | TCRBV06-05*01        | TCRBD01-01*01        | TCRBJ02-07*01        |          |          |
| <b>20</b>       | <b>CASSPQDRGLRDGYTF</b> | <b>64</b>  | <b>1.33751306</b> | <b>TCRBV27-01*01</b> | <b>TCRBD01-01*01</b> | <b>TCRBJ01-02*01</b> | <b>X</b> |          |
| 21              | CASSPRGQGYEQYF          | 62         | 1.29571578        | TCRBV13-01*01        | TCRBD01-01*01        | TCRBJ02-07*01        |          |          |
| 22              | CASSPPGGGADNEQFF        | 62         | 1.29571578        | TCRBV18-01*01        | unresolved           | TCRBJ02-01*01        |          |          |
| <b>23</b>       | <b>CASSQVQAIDTQYF</b>   | <b>59</b>  | <b>1.23301985</b> | <b>TCRBV04-01*01</b> | <b>TCRBD02-01</b>    | <b>TCRBJ02-03*01</b> | <b>X</b> | <b>X</b> |
| 24              | CASSLISRDLWLF           | 55         | 1.14942529        | TCRBV11-02*02        | TCRBD02-01           | TCRBJ02-02*01        |          |          |
| 25              | CASSATSGSWDEQFF         | 55         | 1.14942529        | TCRBV06-01*01        | TCRBD02-01*02        | TCRBJ02-01*01        |          |          |

|           |                         |           |                   |                      |                      |                      |
|-----------|-------------------------|-----------|-------------------|----------------------|----------------------|----------------------|
| 26        | CASSFPDSLIEQYF          | 54        | 1.12852665        | TCRBV28-01*01        | TCRBD01-01*01        | TCRBJ02-07*01        |
| 27        | CASSLYRTITGELFF         | 53        | 1.107628          | TCRBV05-01*01        | TCRBD01-01*01        | TCRBJ02-02*01        |
| 28        | CASSYSNAPAGGQTGELFF     | 52        | 1.08672936        | TCRBV06-07*01        | TCRBD02-01*01        | TCRBJ02-02*01        |
| 29        | CASRGSPAGADTQYF         | 49        | 1.02403344        | TCRBV05-04*01        | unresolved           | TCRBJ02-03*01        |
| 30        | CASSLEAGEETQYF          | 49        | 1.02403344        | TCRBV05-01*01        | TCRBD01-01*01        | TCRBJ02-05*01        |
| 31        | CASRISGGETQYF           | 48        | 1.0031348         | TCRBV11-02*02        | TCRBD02-01*01        | TCRBJ02-05*01        |
| <b>32</b> | <b>CASSQSAATGNYEQYF</b> | <b>48</b> | <b>1.0031348</b>  | <b>TCRBV07-06*01</b> | <b>TCRBD01-01*01</b> | <b>TCRBJ02-07*01</b> |
| <b>33</b> | <b>CSVFQDRGSSGELFF</b>  | <b>44</b> | <b>0.91954023</b> | <b>TCRBV29-01*01</b> | <b>TCRBD01-01*01</b> | <b>TCRBJ02-02*01</b> |
| 34        | CASSSGLADIEQFF          | 42        | 0.87774295        | TCRBV13-01*01        | TCRBD02-01           | TCRBJ02-01*01        |
| 35        | CASFGLERDEQYF           | 41        | 0.85684431        | TCRBV19-01           | TCRBD02-01           | TCRBJ02-07*01        |
| 36        | CASSHNTGGNQPHF          | 41        | 0.85684431        | TCRBV06-05*01        | TCRBD01-01*01        | TCRBJ01-05*01        |
| <b>37</b> | <b>CASSLSGTGVYEQYF</b>  | <b>40</b> | <b>0.83594566</b> | <b>TCRBV12</b>       | <b>TCRBD01-01*01</b> | <b>TCRBJ02-07*01</b> |
| 38        | CASSQFPQALFOSSGNTIYF    | 39        | 0.81504702        | TCRBV18-01*01        | TCRBD01-01*01        | TCRBJ01-03*01        |
| 39        | CSARESSHSGANVLTF        | 36        | 0.7523511         | TCRBV20              | TCRBD02-01           | TCRBJ02-06*01        |
| <b>40</b> | <b>CSAGTIDLNTEAFF</b>   | <b>36</b> | <b>0.7523511</b>  | <b>TCRBV29-01*01</b> | <b>unresolved</b>    | <b>TCRBJ01-01*01</b> |
| 41        | CASSPSSGSQGEQYF         | 34        | 0.71055381        | TCRBV05-01*01        | TCRBD02-01*02        | TCRBJ02-07*01        |
| 42        | CAGSEYSNQPHF            | 34        | 0.71055381        | TCRBV28-01*01        | unresolved           | TCRBJ01-05*01        |
| <b>43</b> | <b>CASSFAKQGGDHEQYF</b> | <b>33</b> | <b>0.68965517</b> | <b>TCRBV07-06*01</b> | <b>TCRBD01-01*01</b> | <b>TCRBJ02-07*01</b> |
| 44        | CAGSESGYGYTF            | 33        | 0.68965517        | TCRBV19-01           | TCRBD01-01*01        | TCRBJ01-02*01        |
| 45        | CASSESMGSETQYF          | 32        | 0.66875653        | TCRBV07-09           | TCRBD01-01*01        | TCRBJ02-05*01        |
| 46        | CASSFGTGTPEMRNYGYTF     | 32        | 0.66875653        | TCRBV05-01*01        | TCRBD01-01*01        | TCRBJ01-02*01        |
| 47        | CASSVTGIPASNEKLF        | 31        | 0.64785789        | TCRBV09-01           | TCRBD02-01*02        | TCRBJ01-04*01        |
| 48        | CASSFRGSGYEQYF          | 31        | 0.64785789        | TCRBV28-01*01        | TCRBD02-01*02        | TCRBJ02-07*01        |
| 49        | CASSPLDGGLSYEQYF        | 30        | 0.62695925        | TCRBV27-01*01        | TCRBD02-01*01        | TCRBJ02-07*01        |
| 50        | CASSIGTYNEQFF           | 28        | 0.58516196        | TCRBV19-01           | unresolved           | TCRBJ02-01*01        |
| <b>51</b> | <b>CASGDYEQYF</b>       | <b>27</b> | <b>0.56426332</b> | <b>TCRBV28-01*01</b> | <b>unresolved</b>    | <b>TCRBJ02-07*01</b> |
| 52        | CSATGTYGYTF             | 26        | 0.54336468        | TCRBV20              | TCRBD01-01*01        | TCRBJ01-02*01        |
| 53        | CASSQDRVTGYTF           | 25        | 0.52246604        | TCRBV19-01           | TCRBD01-01*01        | TCRBJ01-02*01        |
| 54        | CASSHRNSGGDNEQFF        | 25        | 0.52246604        | TCRBV07-06*01        | TCRBD02-01*01        | TCRBJ02-01*01        |
| 55        | CSAISGVAGPNEQFF         | 23        | 0.48066876        | TCRBV20              | TCRBD02-01           | TCRBJ02-01*01        |

|          |          |
|----------|----------|
| <b>X</b> |          |
| <b>X</b> | <b>X</b> |
|          | <b>X</b> |
|          | <b>X</b> |
| <b>X</b> |          |
|          |          |
| <b>X</b> |          |



|           |                          |           |                   |                      |                      |                      |   |
|-----------|--------------------------|-----------|-------------------|----------------------|----------------------|----------------------|---|
| 56        | CASSQDFLPGAYEQYF         | 23        | 0.48066876        | TCRBV14-01*01        | TCRBD01-01*01        | TCRBJ02-07*01        |   |
| 57        | CASSPGLSGANVLTF          | 22        | 0.45977011        | TCRBV13-01*01        | TCRBD01-01*01        | TCRBJ02-06*01        |   |
| 58        | CASSPGPSGNTQYF           | 22        | 0.45977011        | TCRBV05-04*01        | TCRBD02-01           | TCRBJ02-03*01        |   |
| 59        | CASSLGSFEQYF             | 21        | 0.43887147        | TCRBV11-02*02        | unresolved           | TCRBJ02-07*01        |   |
| 60        | CAAADETGAPSTDTQYF        | 21        | 0.43887147        | TCRBV23-01*01        | TCRBD01-01*01        | TCRBJ02-03*01        |   |
| 61        | CSSPGRSEAFF              | 18        | 0.37617555        | TCRBV29-01*01        | unresolved           | TCRBJ01-01*01        |   |
| 62        | CASSSSSPGTGAGYEQYF       | 18        | 0.37617555        | TCRBV07-09           | TCRBD01-01*01        | TCRBJ02-07*01        |   |
| 63        | CAWGDSPNTEAFF            | 17        | 0.35527691        | TCRBV30-01*01        | TCRBD01-01*01        | TCRBJ01-01*01        |   |
| 64        | CASSPLPLGGENTEAFF        | 17        | 0.35527691        | TCRBV18-01*01        | TCRBD02-01*01        | TCRBJ01-01*01        |   |
| <b>65</b> | <b>CSVEISKGTGNYGYTF</b>  | <b>16</b> | <b>0.33437827</b> | <b>TCRBV29-01*01</b> | <b>TCRBD01-01*01</b> | <b>TCRBJ01-02*01</b> | X |
| <b>66</b> | <b>CSAQGLAGGHVDEQFF</b>  | <b>16</b> | <b>0.33437827</b> | <b>TCRBV20</b>       | <b>TCRBD02-01*01</b> | <b>TCRBJ02-01*01</b> | X |
| 67        | CASSVGPSSYEQYF           | 15        | 0.31347962        | TCRBV09-01           | TCRBD01-01*01        | TCRBJ02-07*01        |   |
| 68        | CASSPYTGELFF             | 15        | 0.31347962        | TCRBV07-02*01        | TCRBD02-01           | TCRBJ02-02*01        |   |
| 69        | CASSNSIAGGTNQPQHF        | 15        | 0.31347962        | TCRBV06              | TCRBD01-01*01        | TCRBJ01-05*01        |   |
| 70        | CASSYRQPFYNEQFF          | 14        | 0.29258098        | TCRBV06-05*01        | TCRBD01-01*01        | TCRBJ02-01*01        |   |
| 71        | CASSSLAGGPYEQYF          | 13        | 0.27168234        | TCRBV07-02*01        | TCRBD02-01*01        | TCRBJ02-07*01        |   |
| 72        | CAWSVRRGGNQPHF           | 12        | 0.2507837         | TCRBV30-01*01        | TCRBD02-01           | TCRBJ01-05*01        |   |
| 73        | CASSEMSFRNVGYTF          | 12        | 0.2507837         | TCRBV11-02*02        | unresolved           | TCRBJ01-02*01        |   |
| 74        | CASSPRPEGPEQYF           | 12        | 0.2507837         | TCRBV14-01*01        | unresolved           | TCRBJ02-07*01        |   |
| 75        | CASSPALLGPTDTQYF         | 12        | 0.2507837         | TCRBV28-01*01        | unresolved           | TCRBJ02-03*01        |   |
| 76        | CASSPRGYQETQYF           | 11        | 0.22988506        | TCRBV07-02*01        | TCRBD02-01*01        | TCRBJ02-05*01        |   |
| 77        | CAWSGGYEQYF              | 11        | 0.22988506        | TCRBV30-01*01        | unresolved           | TCRBJ02-07*01        |   |
| 78        | CSAKSTGMEQPQHF           | 11        | 0.22988506        | TCRBV20              | TCRBD01-01*01        | TCRBJ01-05*01        |   |
| <b>79</b> | <b>CASELAGFYEQYF</b>     | <b>11</b> | <b>0.22759437</b> | <b>TCRBV06-01*01</b> | <b>TCRBD02-01*01</b> | <b>TCRBJ02-07*01</b> | X |
| <b>80</b> | <b>CSASEGVYEQYF</b>      | <b>10</b> | <b>0.20898642</b> | <b>TCRBV20</b>       | <b>TCRBD01-01*01</b> | <b>TCRBJ02-07*01</b> | X |
| 81        | CAKRGAGVEAFF             | 9         | 0.18808777        | TCRBV23-01*01        | unresolved           | TCRBJ01-01*01        |   |
| <b>82</b> | <b>CASSSAVAGRRVYEQYF</b> | <b>9</b>  | <b>0.18808777</b> | <b>TCRBV07-09</b>    | <b>TCRBD02-01*01</b> | <b>TCRBJ02-07*01</b> | X |
| 83        | CASSFLIRDSKETQYF         | 8         | 0.16718913        | TCRBV07-06*01        | TCRBD01-01*01        | TCRBJ02-05*01        |   |
| <b>84</b> | <b>CASTVSN SPLHF</b>     | <b>8</b>  | <b>0.16718913</b> | <b>TCRBV13-01*01</b> | <b>TCRBD02-01</b>    | <b>TCRBJ01-06*01</b> | X |
| 85        | CSARGAGGLGEQYF           | 8         | 0.16718913        | TCRBV20              | TCRBD01-01*01        | TCRBJ02-07*01        |   |

|           |                       |          |                  |                      |                      |                      |
|-----------|-----------------------|----------|------------------|----------------------|----------------------|----------------------|
| 86        | CASSPSGDGYNEQFF       | 7        | 0.14629049       | TCRBV07-09           | TCRBD02-01*01        | TCRBJ02-01*01        |
| <b>87</b> | <b>CASSGRGPSYGYTF</b> | <b>6</b> | <b>0.1276608</b> | <b>TCRBV11-02*02</b> | <b>TCRBD01-01*01</b> | <b>TCRBJ01-02*01</b> |
| 88        | CASSVDGRALDTQYF       | 6        | 0.12539185       | TCRBV09-01           | TCRBD02-01*02        | TCRBJ02-03*01        |
| 89        | CASSLLAGGHNEQFF       | 6        | 0.12539185       | TCRBV07-08*01        | TCRBD02-01*01        | TCRBJ02-01*01        |
| 90        | CASSFLRGQGEFF         | 5        | 0.10449321       | TCRBV07-08*01        | TCRBD01-01*01        | TCRBJ02-01*01        |
| 91        | CASFGLERDEQYF         | 3        | 0.06269592       | TCRBV19-01           | unresolved           | TCRBJ02-05*01        |
| 92        | CASSEGDRHSVDTEAFF     | 3        | 0.06269592       | TCRBV03              | TCRBD02-01*02        | TCRBJ01-01*01        |
| 93        | CASSPALLGPTDTQYF      | 3        | 0.06269592       | TCRBV28-01*01        | unresolved           | TCRBJ02-03*01        |
| 94        | CSGSGPNAQYF           | 2        | 0.04179728       | TCRBV20-01*01        | unresolved           | TCRBJ02-05*01        |
| 95        | CASSPRGYQETQYF        | 2        | 0.04179728       | TCRBV07-02*01        | TCRBD02-01*01        | TCRBJ02-05*01        |
| 96        | CASSSSAVAGRrvYEQYF    | 2        | 0.04179728       | TCRBV07-09           | TCRBD02-01*01        | TCRBJ02-05*01        |
| 97        | CSARGAGGLGEQYF        | 2        | 0.04179728       | TCRBV20              | TCRBD01-01*01        | TCRBJ02-05*01        |
| 98        | CASSPLDGGLSYEQYF      | 2        | 0.04179728       | TCRBV27-01*01        | TCRBD02-01*01        | TCRBJ02-05*01        |
| 99        | CAWSVRLSNSPLHF        | 2        | 0.04179728       | TCRBV30-01*01        | TCRBD02-01*02        | TCRBJ01-06*01        |

|   |
|---|
| X |
|---|

Lesion II

|           |                         |             |                    |                      |                      |                      |
|-----------|-------------------------|-------------|--------------------|----------------------|----------------------|----------------------|
| <b>1</b>  | <b>CASRAGNTEAFF</b>     | <b>4533</b> | <b>37.02611971</b> | <b>TCRBV19-01</b>    | <b>TCRBD01-01*01</b> | <b>TCRBJ01-01*01</b> |
| <b>2</b>  | <b>CASSTLGGKYQPQHF</b>  | <b>2348</b> | <b>19.22541554</b> | <b>TCRBV19-01</b>    | <b>unresolved</b>    | <b>TCRBJ01-05*01</b> |
| 3         | CATSDEGAATNEKLFF        | 964         | 7.89322853         | TCRBV24              | TCRBD01-01*01        | TCRBJ01-04*01        |
| <b>4</b>  | <b>CASNPGTAYSIEQYF</b>  | <b>473</b>  | <b>3.8729223</b>   | <b>TCRBV06-01*01</b> | <b>TCRBD01-01*01</b> | <b>TCRBJ02-07*01</b> |
| 5         | CASSPDRLKGYGYTF         | 283         | 2.31720298         | TCRBV12              | TCRBD01-01*01        | TCRBJ01-02*01        |
| 6         | CAIMGGTSGANVLTf         | 252         | 2.06337509         | TCRBV10-03*01        | TCRBD02-01*01        | TCRBJ02-06*01        |
| 7         | CASSHGTGNQPQHF          | 216         | 1.76860722         | TCRBV06-05*01        | TCRBD01-01*01        | TCRBJ01-05*01        |
| 8         | CAIRAGTGAFf             | 213         | 1.74404323         | TCRBV10-03*01        | unresolved           | TCRBJ01-01*01        |
| 9         | CASSVTQNYGYTF           | 180         | 1.47383935         | TCRBV06-01*01        | TCRBD01-01*01        | TCRBJ01-02*01        |
| 10        | CASKLANTEAFF            | 162         | 1.32645542         | TCRBV07-09           | TCRBD02-01           | TCRBJ01-01*01        |
| <b>11</b> | <b>CASSQSAATGNIEQYF</b> | <b>153</b>  | <b>1.25276345</b>  | <b>TCRBV07-06*01</b> | <b>TCRBD01-01*01</b> | <b>TCRBJ02-07*01</b> |
| 12        | CASTARVIEQYF            | 132         | 1.08081552         | TCRBV02-01*01        | unresolved           | TCRBJ02-07*01        |

|                  |       |
|------------------|-------|
| Also present in: |       |
| L-I              | L-III |

|   |
|---|
| X |
| X |

|   |   |
|---|---|
| X | X |
|---|---|

|   |
|---|
| X |
|---|

|           |                           |           |                   |                      |                      |                      |
|-----------|---------------------------|-----------|-------------------|----------------------|----------------------|----------------------|
| 13        | CASSSTGYSNQPHF            | 118       | 0.96618357        | TCRBV06-06           | TCRBD01-01*01        | TCRBJ01-05*01        |
| 14        | CASSAQGGIGTIYEQYF         | 106       | 0.86792762        | TCRBV07-08*01        | TCRBD01-01*01        | TCRBJ02-07*01        |
| 15        | CASVGSYEQYF               | 98        | 0.80242365        | TCRBV07-09           | unresolved           | TCRBJ02-07*01        |
| 16        | CASSPPTADTQYF             | 98        | 0.80242365        | TCRBV28-01*01        | unresolved           | TCRBJ02-03*01        |
| 17        | CASSPHLRIPSGNTIYF         | 89        | 0.72873168        | TCRBV18-01*01        | unresolved           | TCRBJ01-03*01        |
| 18        | CASSQOHTTGNTGELFF         | 88        | 0.72054368        | TCRBV04-02*01        | TCRBD01-01*01        | TCRBJ02-02*01        |
| 19        | CASSFTGRAYQPQHF           | 83        | 0.6796037         | TCRBV28-01*01        | unresolved           | TCRBJ01-05*01        |
| 20        | CASSVGVSVQETQ*F           | 81        | 0.66322771        | TCRBV09-01           | TCRBD02-01           | TCRBJ02              |
| 21        | CATSEQGARNNEQFF           | 80        | 0.65503971        | TCRBV24              | TCRBD01-01*01        | TCRBJ02-01*01        |
| 22        | CASSPIDRWEYQETQYF         | 78        | 0.63866372        | TCRBV12              | TCRBD01-01*01        | TCRBJ02-05*01        |
| 23        | CASSPNVLLTEAFF            | 77        | 0.63047572        | TCRBV27-01*01        | unresolved           | TCRBJ01-01*01        |
| 24        | CASRGTGGTYEQYF            | 74        | 0.60591173        | TCRBV11-02*02        | TCRBD01-01*01        | TCRBJ02-07*01        |
| 25        | CASSDAGYGEQFF             | 70        | 0.57315975        | TCRBV06-04           | TCRBD02-01           | TCRBJ02-01*01        |
| <b>26</b> | <b>CASSPQDRGLRDLGYTF</b>  | <b>70</b> | <b>0.57315975</b> | <b>TCRBV27-01*01</b> | <b>TCRBD01-01*01</b> | <b>TCRBJ01-02*01</b> |
| <b>27</b> | <b>CASTVSN SPLHF</b>      | <b>63</b> | <b>0.51584377</b> | <b>TCRBV13-01*01</b> | <b>TCRBD02-01</b>    | <b>TCRBJ01-06*01</b> |
| <b>28</b> | <b>CSVFQDRGSSGELFF</b>    | <b>61</b> | <b>0.49946778</b> | <b>TCRBV29-01*01</b> | <b>TCRBD01-01*01</b> | <b>TCRBJ02-02*01</b> |
| 29        | CASKGSPYEQYF              | 57        | 0.46671579        | TCRBV25-01*01        | unresolved           | TCRBJ02-07*01        |
| 30        | CASSLGTGGRSEAFF           | 56        | 0.4585278         | TCRBV18-01*01        | TCRBD01-01*01        | TCRBJ01-01*01        |
| 31        | CASSLGQNYGYTF             | 55        | 0.4503398         | TCRBV07-08*01        | TCRBD01-01*01        | TCRBJ01-02*01        |
| <b>32</b> | <b>CASSSSAVAGRRVYEQYF</b> | <b>52</b> | <b>0.42577581</b> | <b>TCRBV07-09</b>    | <b>TCRBD02-01*01</b> | <b>TCRBJ02-07*01</b> |
| <b>33</b> | <b>CASSQVQAIDTQYF</b>     | <b>49</b> | <b>0.40121182</b> | <b>TCRBV04-01*01</b> | <b>TCRBD02-01</b>    | <b>TCRBJ02-03*01</b> |
| 34        | CASSIAGNTGELFF            | 49        | 0.40121182        | TCRBV19-01           | TCRBD02-01           | TCRBJ02-02*01        |
| <b>35</b> | <b>CASGDYEQYF</b>         | <b>49</b> | <b>0.40121182</b> | <b>TCRBV28-01*01</b> | <b>unresolved</b>    | <b>TCRBJ02-07*01</b> |
| 36        | CASINRSSGRFWSETQYF        | 44        | 0.36027184        | TCRBV28-01*01        | TCRBD02-01*02        | TCRBJ02-05*01        |
| <b>37</b> | <b>CSVEGQGASETQYF</b>     | <b>42</b> | <b>0.34389585</b> | <b>TCRBV29-01*01</b> | <b>TCRBD01-01*01</b> | <b>TCRBJ02-05*01</b> |
| 38        | CASSLMEGTSGNTDTQYF        | 39        | 0.31933186        | TCRBV28-01*01        | TCRBD02-01*02        | TCRBJ02-03*01        |
| 39        | CASREGNTEAFF              | 37        | 0.30295587        | TCRBV19-01           | unresolved           | TCRBJ01-01*01        |
| 40        | CSVEEFF                   | 36        | 0.29476787        | TCRBV29-01*01        | TCRBD02-01*02        | TCRBJ01-02*01        |
| 41        | CASSSIAESTDTQYF           | 35        | 0.28657987        | TCRBV18-01*01        | TCRBD02-01           | TCRBJ02-03*01        |
| 42        | CSVEDKQEGYEKLFF           | 34        | 0.27839188        | TCRBV29-01*01        | TCRBD02-01*02        | TCRBJ01-04*01        |

|   |   |
|---|---|
| X |   |
| X |   |
| X | X |
|   |   |
| X |   |
| X | X |
|   |   |
| X |   |
|   |   |
|   | X |

|                            |          |                   |                      |                      |                      |
|----------------------------|----------|-------------------|----------------------|----------------------|----------------------|
| 43 CASNPTYNEQFF            | 31       | 0.25382789        | TCRBV28-01*01        | unresolved           | TCRBJ02-01*01        |
| 44 CASSLREFAEAFF           | 29       | 0.2374519         | TCRBV11-02*02        | TCRBD02-01*02        | TCRBJ01-01*01        |
| 45 CASSQERGQPQHF           | 23       | 0.18832392        | TCRBV04-01*01        | TCRBD01-01*01        | TCRBJ01-05*01        |
| 46 CSVEGTPGTQYF            | 23       | 0.18832392        | TCRBV29-01*01        | unresolved           | TCRBJ02-05*01        |
| 47 CASDRDPGNTIYF           | 18       | 0.14738394        | TCRBV07-04*01        | TCRBD01-01*01        | TCRBJ01-03*01        |
| 48 CSAHRGHNSPLHF           | 17       | 0.13919594        | TCRBV20              | TCRBD01-01*01        | TCRBJ01-06*01        |
| 49 CSVRGGDSYEQYF           | 17       | 0.13919594        | TCRBV29-01*01        | TCRBD02-01*01        | TCRBJ02-07*01        |
| 50 CASTARVYEQYF            | 13       | 0.10644395        | TCRBV02-01*01        | unresolved           | TCRBJ02-05*01        |
| 51 CASKGSPYEQYF            | 13       | 0.10644395        | TCRBV25-01*01        | unresolved           | TCRBJ02-07*01        |
| 52 CASSLREFAEAFF           | 12       | 0.09825596        | TCRBV11-02*02        | TCRBD02-01*02        | TCRBJ01-01*01        |
| 53 CASNHAWVSNQPQHF         | 7        | 0.05731597        | TCRBV23-01*01        | unresolved           | TCRBJ01-05*01        |
| 54 CASSFRLAGPYEQYF         | 5        | 0.04093998        | TCRBV09-01           | TCRBD02-01*02        | TCRBJ02-07*01        |
| 55 CASSLGGGRANEQFF         | 3        | 0.02456399        | TCRBV05-01*01        | TCRBD02-01*02        | TCRBJ02-01*01        |
| <b>56 CASSFAKQGGDHEQYF</b> | <b>3</b> | <b>0.02456399</b> | <b>TCRBV07-06*01</b> | <b>TCRBD01-01*01</b> | <b>TCRBJ02-07*01</b> |
| 57 CASGDYEQYF              | 3        | 0.02456399        | TCRBV28-01*01        | TCRBD02-01           | TCRBJ02-05*01        |

X
